# Supplementary material
Source: MDPI journal article supplement (https://www.mdpi.com/2073-4433/13/5/711)
Supplement: s1 [file s1]

Supplementary Materials

# Understanding the Sources of Ambient Fine Particulate Matter (PM<sub>2.5</sub>) in Jeddah, Saudi Arabia

Shedrack R. Nayebare <sup>1,2</sup>, Omar S. Aburizaiza <sup>3</sup>, Azhar Siddique <sup>3</sup>, Mirza M. Hussain <sup>1,2</sup>, Jahan Zeb <sup>4</sup>, Fida Khatib <sup>2</sup>, David O. Carpenter <sup>1,5</sup>, Donald R. Blake <sup>6</sup> and Haider A. Khwaja <sup>1,2,\*</sup>

<sup>11</sup> Department of Environmental Health Sciences, School of Public Health, University at Albany, Albany, NY 12201, USA; shedrack.nayebare@usp.org (S.R.N.); mirza.hussain@health.ny.gov (M.M.H.); dcarpenter@albany.edu (D.O.C.)

<sup>2</sup> Wadsworth Center, New York State Department of Health, Albany, NY 12201, USA; fida.khatib@health.ny.gov

<sup>3</sup> Unit for Ain Zubaida Rehabilitation and Ground Water Research, King Abdul-Aziz University, P.O. Box 80200, Jeddah 21589, Saudi Arabia; orzizah@kau.edu.sa (O.S.A.); azsiddique@hubku.edu.qa (A.S.)

<sup>4</sup> Department of Environmental and Health Research. The Custodian of the Holy Two Mosques Institute for Hajj and Umrah Research, Umm Al-Qura University, P.O. Box 6287, Makkah al Mukarramah 21955, Saudi Arabia; jzhabib@uqu.edu.sa

<sup>5</sup> Institute for the Health & the Environment, University at Albany, Rensselaer, NY 12144, USA

<sup>6</sup> Department of Chemistry, University of California, Irvine, CA 92617, USA; drblake@uci.edu

\* Correspondence: haider.khwaja@health.ny.gov or hkhwaja@albany.edu; Tel.: +1-518-474-0516

**Citation:** Nayebare, S.R.; Aburizaiza, O.S.; Siddique, A.; Hussain, M.M.; Zeb, J.; Khatib, F.; Carpenter, D.O.; Blake, D.R.; Khwaja, H.A.

Understanding the Sources of Ambient Fine Particulate Matter (PM<sub>2.5</sub>) in Jeddah, Saudi Arabia. *Atmosphere* **2022**, *13*, 711. <https://doi.org/10.3390/atmos13050711>

Academic Editor: Sunling Gong

Received: 30 March 2022

Accepted: 27 April 2022

Published: 29 April 2022

**Publisher's Note:** MDPI stays neutral with regard to jurisdictional claims in published maps and institutional affiliations.

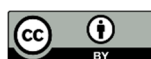

**Copyright:** © 2022 by the authors. Licensee MDPI, Basel, Switzerland. This article is an open access article distributed under the terms and conditions of the Creative Commons Attribution (CC BY) license (<http://creativecommons.org/licenses/by/4.0/>).

**Table S1.** Summary of the optimum conditions for analysis of water-soluble cations and anions by ion exchange chromatography.

| Instrument Parameter  | Anions Analysis                                                    | Cations Analysis                                                  |
|-----------------------|--------------------------------------------------------------------|-------------------------------------------------------------------|
| Instrument            | Dionex ICS 3000 ion chromatography system                          | Dionex ICS 2500 ion chromatography system                         |
| Analytical column     | Dionex IonPac™ AS14 4mm * 250mm                                    | Dionex IonPac® CS14 4mm * 250mm                                   |
| Guard column          | IonPac™ AG14 4mm * 50mm                                            | IonPac™ CG14 4mm                                                  |
| Suppressor            | Anion Self-Regenerating Suppressor (ASRS) 300                      | Cationic electrolytic suppressor (CAES)                           |
| Sampler               | Automatic sampler (AS)                                             | AS50                                                              |
| Gradient pump         | Single pump                                                        | Gradient pump (GP50)                                              |
| Detector              | Conductivity detector                                              | Conductivity detector (CD25A)                                     |
| Chromeleon software   | Dionex Chromeleon software (version 6.80 SP4 Build 2361)           | Dionex Chromeleon software (version 6.60)                         |
| Eluent                | 1.0 mM NaHCO <sub>3</sub>   3.5 mM Na <sub>2</sub> CO <sub>3</sub> | 10.0 mM methane-sulfonic acid (CH <sub>3</sub> SO <sub>3</sub> H) |
| Injection volume      | 50.0 µL                                                            | 35.0 µL                                                           |
| Run time              | 15.0 min                                                           | 22.0 min                                                          |
| Flow rate (ml/min)    | 1.10                                                               | 1.20                                                              |
| Gradient pressure     | 1300–1400 psi                                                      | 1000–1050 psi                                                     |
| Suppressor current    | 36 mA                                                              | 40 mA                                                             |
| Baseline conductivity | 15–18 µS                                                           | 34–36 µS                                                          |

**Table S2.** Typical detection limits of elements measured on a Thermo Scientific™ ARL™ QUANT'X ED-XRF Spectrometer (based on [1]).

|           | ng/cm <sup>2</sup> | ng/m <sup>3</sup> |           | ng/cm <sup>2</sup> | ng/m <sup>3</sup> |           | ng/m <sup>2</sup> | ng/m <sup>3</sup> |           | ng/m <sup>2</sup> | ng/m <sup>3</sup> |
|-----------|--------------------|-------------------|-----------|--------------------|-------------------|-----------|-------------------|-------------------|-----------|-------------------|-------------------|
| <b>Na</b> | 14.14              | 9.88              | <b>Mn</b> | 0.85               | 0.59              | <b>Zr</b> | 1.56              | 1.09              | <b>Eu</b> | 2.83              | 1.98              |
| <b>Mg</b> | 4.24               | 2.96              | <b>Fe</b> | 0.71               | 0.50              | <b>Nb</b> | 1.70              | 1.19              | <b>Tb</b> | 2.83              | 1.98              |
| <b>Al</b> | 3.68               | 2.57              | <b>Co</b> | 0.99               | 0.69              | <b>Mo</b> | 2.83              | 1.98              | <b>Hf</b> | 4.24              | 2.96              |
| <b>Si</b> | 3.54               | 2.47              | <b>Ni</b> | 0.71               | 0.50              | <b>Ag</b> | 8.49              | 5.93              | <b>Ta</b> | 2.83              | 1.98              |
| <b>P</b>  | 3.39               | 2.37              | <b>Cu</b> | 0.85               | 0.59              | <b>Cd</b> | 8.49              | 5.93              | <b>W</b>  | 2.26              | 1.58              |
| <b>S</b>  | 2.83               | 1.98              | <b>Zn</b> | 0.85               | 0.59              | <b>In</b> | 11.31             | 7.90              | <b>Ir</b> | 1.84              | 1.29              |
| <b>Cl</b> | 2.4                | 1.68              | <b>Ga</b> | 0.85               | 0.59              | <b>Sn</b> | 14.14             | 9.88              | <b>Au</b> | 1.70              | 1.19              |
| <b>K</b>  | 2.26               | 1.58              | <b>As</b> | 0.85               | 0.59              | <b>Sb</b> | 15.56             | 10.9              | <b>Hg</b> | 1.56              | 1.09              |
| <b>Ca</b> | 2.26               | 1.58              | <b>Se</b> | 0.71               | 0.50              | <b>Cs</b> | 4.24              | 2.96              | <b>Pb</b> | 1.56              | 1.09              |
| <b>Sc</b> | 1.70               | 1.19              | <b>Br</b> | 0.71               | 0.50              | <b>Ba</b> | 4.53              | 3.16              |           |                   |                   |
| <b>Ti</b> | 1.41               | 0.98              | <b>Rb</b> | 0.85               | 0.59              | <b>La</b> | 3.54              | 2.47              |           |                   |                   |
| <b>V</b>  | 1.41               | 0.98              | <b>Sr</b> | 1.13               | 0.79              | <b>Ce</b> | 2.83              | 1.98              |           |                   |                   |
| <b>Cr</b> | 0.99               | 0.69              | <b>Y</b>  | 1.41               | 0.98              | <b>Sm</b> | 2.83              | 1.98              |           |                   |                   |

**Table S3.** Summary of the overall variations in expected and observed  $\text{SO}_4^{2-}$ ,  $\text{NH}_4^+$  and  $\text{NO}_3^-$  during the four sampling cycles in Jeddah, Saudi Arabia.

|                | Total S ( $\mu\text{g}/\text{m}^3$ ) | Expected $\text{SO}_4^{2-}$ ( $\mu\text{g}/\text{m}^3$ ) | Observed $\text{SO}_4^{2-}$ ( $\mu\text{g}/\text{m}^3$ ) | Unexplained $\text{SO}_4^{2-}$ ( $\mu\text{g}/\text{m}^3$ ) | $\text{NH}_4^+$ ( $\mu\text{g}/\text{m}^3$ ) | $\text{NO}_3^-$ ( $\mu\text{g}/\text{m}^3$ ) |
|----------------|--------------------------------------|----------------------------------------------------------|----------------------------------------------------------|-------------------------------------------------------------|----------------------------------------------|----------------------------------------------|
| Cycle_1        | 4972 $\pm$ 2577                      | 14.92                                                    | 17.8 $\pm$ 17.0                                          | -2.88                                                       | 2.49 $\pm$ 1.90                              | 1.45 $\pm$ 0.90                              |
| Cycle_2        | 4434 $\pm$ 1301                      | 13.30                                                    | 8.51 $\pm$ 3.23                                          | 4.79                                                        | 2.43 $\pm$ 0.86                              | 1.12 $\pm$ 0.80                              |
| Cycle_3        | 6838 $\pm$ 2714                      | 20.51                                                    | 12.1 $\pm$ 4.94                                          | 8.41                                                        | 3.20 $\pm$ 1.25                              | 0.88 $\pm$ 0.55                              |
| Cycle_4        | 4348 $\pm$ 2216                      | 13.04                                                    | 8.6 $\pm$ 4.69                                           | 4.44                                                        | 3.16 $\pm$ 1.74                              | 1.16 $\pm$ 0.55                              |
| <b>Average</b> | 5148 $\pm$ 1160                      | 15.44 $\pm$ 3.48                                         | 11.75 $\pm$ 4.36                                         | 3.69 $\pm$ 4.74                                             | 2.82 $\pm$ 0.42                              | 1.15 $\pm$ 0.23                              |

**Table S4.** Pearson correlations between different pollutant species measured from  $\text{PM}_{2.5}$  and with meteorology—Refer to the appended excel sheet.

**Table S5.** Mean values for the elemental enrichment factors (EFs) per study cycle.

| TE | Cycle 1 |      |      |        | Cycle 2 |      |      |        | Cycle 3 |      |      |        | Cycle 4 |      |      |        |
|----|---------|------|------|--------|---------|------|------|--------|---------|------|------|--------|---------|------|------|--------|
|    | Mean    | SD   | Min  | Max    |
| Si | 0.86    | 0.10 | 0.73 | 1.20   | 1.09    | 0.42 | 0.67 | 2.93   | 0.81    | 0.07 | 0.64 | 1.11   | 1.04    | 0.30 | 0.80 | 2.23   |
| Ti | 1.59    | 0.25 | 1.23 | 2.35   | 2.51    | 1.20 | 1.18 | 7.14   | 1.57    | 0.28 | 1.23 | 2.55   | 2.01    | 0.69 | 1.35 | 4.50   |
| Fe | 1.77    | 0.34 | 1.27 | 2.92   | 2.94    | 1.39 | 1.37 | 7.79   | 1.75    | 0.29 | 1.42 | 3.05   | 2.27    | 0.85 | 1.56 | 5.67   |
| Mg | 1.95    | 1.16 | 0.85 | 6.11   | 4.88    | 5.15 | 0.57 | 28.9   | 2.28    | 1.43 | 1.40 | 10.07  | 1.62    | 0.83 | 0.97 | 5.41   |
| K  | 1.98    | 1.11 | 1.02 | 6.18   | 5.27    | 4.57 | 0.61 | 24.2   | 2.37    | 1.34 | 1.07 | 8.66   | 2.04    | 1.23 | 1.06 | 7.26   |
| Mn | 2.49    | 0.83 | 1.32 | 4.72   | 3.88    | 2.46 | 1.46 | 13.7   | 2.47    | 0.57 | 1.75 | 3.91   | 3.08    | 1.48 | 1.19 | 7.56   |
| Sr | 2.62    | 1.26 | 1.37 | 6.78   | 5.36    | 4.48 | 0.72 | 21.1   | 2.24    | 0.88 | 1.20 | 6.46   | 2.72    | 1.04 | 1.37 | 7.11   |
| Ca | 3.31    | 1.41 | 1.66 | 7.70   | 6.35    | 4.54 | 0.68 | 22.9   | 3.22    | 1.06 | 1.85 | 8.18   | 3.78    | 1.89 | 1.65 | 11.6   |
| Cr | 4.21    | 1.90 | 1.79 | 9.84   | 7.86    | 6.18 | 1.34 | 25.3   | 4.23    | 3.76 | 0.74 | 25.9   | 6.85    | 6.99 | 2.29 | 41.9   |
| Na | 5.70    | 6.71 | 0.76 | 30.1   | 23.1    | 28.9 | 0.08 | 158    | 5.99    | 7.88 | 1.16 | 47.8   | 4.53    | 6.12 | 0.45 | 35.4   |
| Ce | 7.64    | 6.65 | 0.66 | 29.8   | 36.7    | 36.6 | 0.69 | 168    | 14.8    | 7.64 | 1.27 | 31.3   | 6.28    | 5.06 | 1.04 | 23.3   |
| Ni | 19.2    | 9.85 | 2.66 | 44.1   | 71.2    | 60.7 | 3.57 | 258    | 23.0    | 11.4 | 6.91 | 55.6   | 15.7    | 12.6 | 2.75 | 62.5   |
| V  | 22.6    | 13.0 | 0.06 | 71.3   | 104     | 97.1 | 4.06 | 455    | 29.3    | 18.9 | 5.38 | 79.2   | 14.1    | 13.9 | 0.10 | 58.2   |
| Cu | 25.0    | 18.5 | 3.34 | 85.2   | 49.6    | 38.7 | 3.55 | 189    | 28.7    | 36.4 | 8.86 | 256    | 32.9    | 30.2 | 5.67 | 142    |
| Y  | 30.7    | 44.8 | 0.58 | 216    | 37.3    | 59.1 | 0.41 | 241    | 29.9    | 30.7 | 0.85 | 119    | 44.6    | 52.2 | 0.94 | 195    |
| Zn | 96.5    | 135  | 10.5 | 770    | 234     | 460  | 4.79 | 2731   | 83.3    | 70.4 | 26.7 | 340    | 95.0    | 153  | 8.74 | 844    |
| Cl | 657     | 1546 | 0.20 | 8596   | 1027    | 2569 | 0.07 | 14,547 | 293     | 1354 | 0.34 | 8934   | 270     | 736  | 0.17 | 4500   |
| S  | 1714    | 1025 | 134  | 4212   | 6355    | 5514 | 143  | 20,261 | 2949    | 1190 | 912  | 5664   | 1881    | 1449 | 228  | 6573   |
| Pb | 2140    | 2958 | 24.2 | 14,452 | 1952    | 2962 | 10.4 | 11,203 | 2330    | 2474 | 52.3 | 9841   | 3435    | 4045 | 61.4 | 15,769 |
| Br | 2319    | 2376 | 320  | 12,562 | 10,285  | 9912 | 136  | 46,597 | 3614    | 3125 | 1061 | 19,518 | 2548    | 2956 | 557  | 18,236 |
| Lu | 3572    | 2502 | 616  | 12,638 | 8802    | 7960 | 468  | 38,121 | 3476    | 1714 | 1311 | 8544   | 4086    | 3735 | 808  | 18,950 |

**Table S6.** Summary of the PMF solution in Jeddah: Sources of PM<sub>2.5</sub> and their overall relative contributions.

| Source/Factor |                             | Factor contribution (%) |            |            |            | Average    |
|---------------|-----------------------------|-------------------------|------------|------------|------------|------------|
|               |                             | Cycle 1                 | Cycle 2    | Cycle 3    | Cycle 4    |            |
| 1.            | Fossil-fuels/oil combustion | 44.3                    | 30.2       | 40.7       | 31.3       | 36.6       |
| 2.            | Vehicular emissions         | 19.0                    | 19.9       | 12.9       | 11.4       | 15.8       |
| 3.            | Soil/dust resuspension      | 16.1                    | 29.0       | 16.5       | 30.2       | 23.0       |
| 4.            | Industrial mixed dust       | 14.2                    | 17.4       | 20.5       | 18.6       | 17.7       |
| 5.            | Sea spray                   | 6.4                     | —          | —          | —          | 6.9        |
| 6.            | Urban dust                  | —                       | 3.5        | 9.4        | 8.4        |            |
| <b>Total</b>  |                             | <b>100</b>              | <b>100</b> | <b>100</b> | <b>100</b> | <b>100</b> |

**Table S7.** Signal-to-Noise ratios (S/N) and classifications/categories of air pollutant species used for PMF analysis per cycle in Jeddah.

| Pollutant Specie                         | Cycle 1  |     | Cycle 2  |     | Cycle 3  |     | Cycle 4  |     |
|------------------------------------------|----------|-----|----------|-----|----------|-----|----------|-----|
|                                          | Category | S/N | Category | S/N | Category | S/N | Category | S/N |
| PM <sub>2.5</sub>                        | Weak     | 10  | Weak     | 10  | Weak     | 10  | Weak     | 10  |
| Black carbon (BC)                        | Strong   | 10  | Strong   | 10  | Strong   | 10  | Strong   | 10  |
| Sodium (Na)                              | Strong   | 10  | Strong   | 10  | Strong   | 10  | Strong   | 10  |
| Magnesium (Mg)                           | Strong   | 10  | Strong   | 10  | Strong   | 10  | Strong   | 10  |
| Aluminum (Al)                            | Strong   | 10  | Strong   | 10  | Strong   | 10  | Strong   | 10  |
| Silicon (Si)                             | Strong   | 10  | Strong   | 10  | Strong   | 10  | Strong   | 10  |
| Sulfur (S)                               | Strong   | 10  | Strong   | 10  | Strong   | 10  | Strong   | 10  |
| Chlorine (Cl)                            | Strong   | 6.4 | Strong   | 5.2 | Weak     | 3.2 | Strong   | 5.8 |
| Potassium (K)                            | Strong   | 10  | Strong   | 10  | Strong   | 10  | Strong   | 10  |
| Calcium (Ca)                             | Strong   | 10  | Strong   | 10  | Strong   | 10  | Strong   | 10  |
| Titanium (Ti)                            | Strong   | 10  | Strong   | 10  | Strong   | 10  | Strong   | 10  |
| Vanadium (V)                             | Strong   | 9.5 | Strong   | 10  | Strong   | 10  | Strong   | 7.8 |
| Chromium (Cr)                            | Strong   | 8.8 | Strong   | 9.6 | Strong   | 9.1 | Strong   | 9.9 |
| Manganese (Mn)                           | Strong   | 10  | Strong   | 10  | Strong   | 10  | Strong   | 10  |
| Iron (Fe)                                | Strong   | 10  | Strong   | 10  | Strong   | 10  | Strong   | 10  |
| Nickel (Ni)                              | Strong   | 10  | Strong   | 10  | Strong   | 10  | Strong   | 10  |
| Copper (Cu)                              | Strong   | 10  | Strong   | 10  | Strong   | 10  | Strong   | 10  |
| Zinc (Zn)                                | Strong   | 10  | Strong   | 10  | Strong   | 10  | Strong   | 10  |
| Bromine (Br)                             | Strong   | 9.3 | Strong   | 9.0 | Strong   | 10  | Strong   | 10  |
| Strontium (Sr)                           | Strong   | 10  | Strong   | 7.8 | Strong   | 10  | Strong   | 10  |
| Yttrium (Y)                              | Strong   | 7.8 | Weak     | 4.4 | Strong   | 7.7 | Strong   | 9.3 |
| Cerium (Ce)                              | Weak     | 3.0 | Strong   | 5.1 | Weak     | 3.9 | Weak     | 4.4 |
| Erbium (Er)                              | Strong   | 7.3 | Strong   | 5.9 | Strong   | 7.7 | Strong   | 7.6 |
| Lutetium (Lu)                            | Strong   | 9.9 | Strong   | 10  | Strong   | 10  | Strong   | 10  |
| Lead (Pb)                                | Strong   | 9.3 | Strong   | 8.7 | Strong   | 9.9 | Strong   | 10  |
| Ammonium (NH <sub>4</sub> <sup>+</sup> ) | Strong   | 9.8 | Strong   | 10  | Strong   | 10  | Strong   | 10  |
| Nitrate (NO <sub>3</sub> <sup>-</sup> )  | Strong   | 10  | Strong   | 10  | Strong   | 10  | Strong   | 10  |

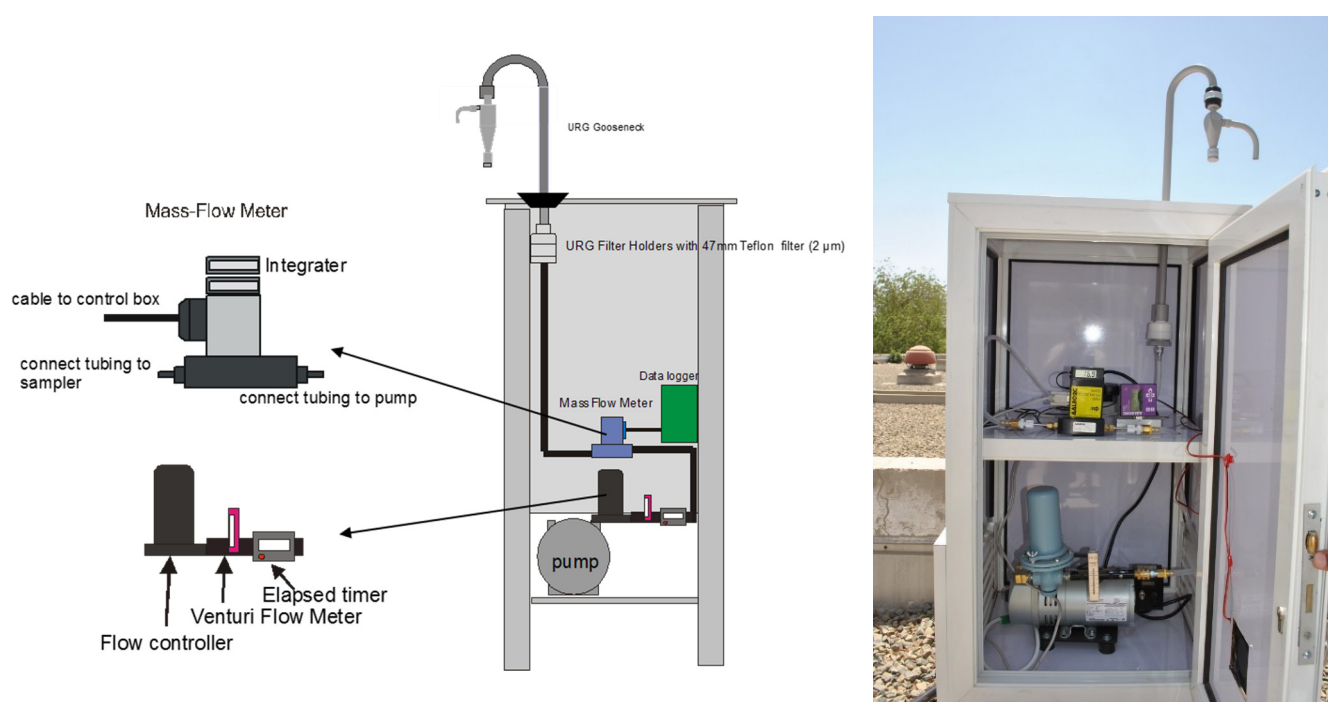

**Figure S1.** An assembled PM<sub>2.5</sub> sampler showing the major components—Photo by author(s).

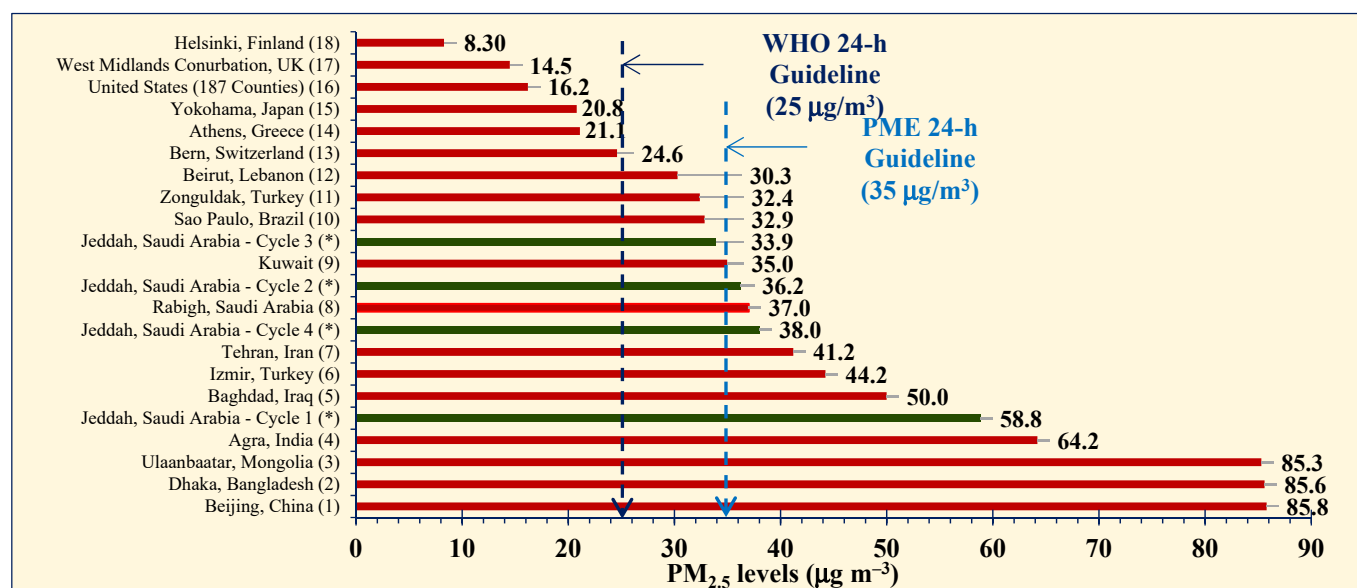

**Figure S2.** Comparison of mean PM<sub>2.5</sub> levels measured in Jeddah with other cities worldwide. 1—[2]; 2—[3]; 3—[4]; 4—[5]; 5—[6]; 6—[7]; 7—[8]; 8—[9]; 9—[10]; 10—[11]; 11—[12]; 12—[13]; 13—[14]; 14—[15]; 15—[16]; 16—[17]; 17—[18]; 18—[19]; \*—Cycles (1–4)—current study



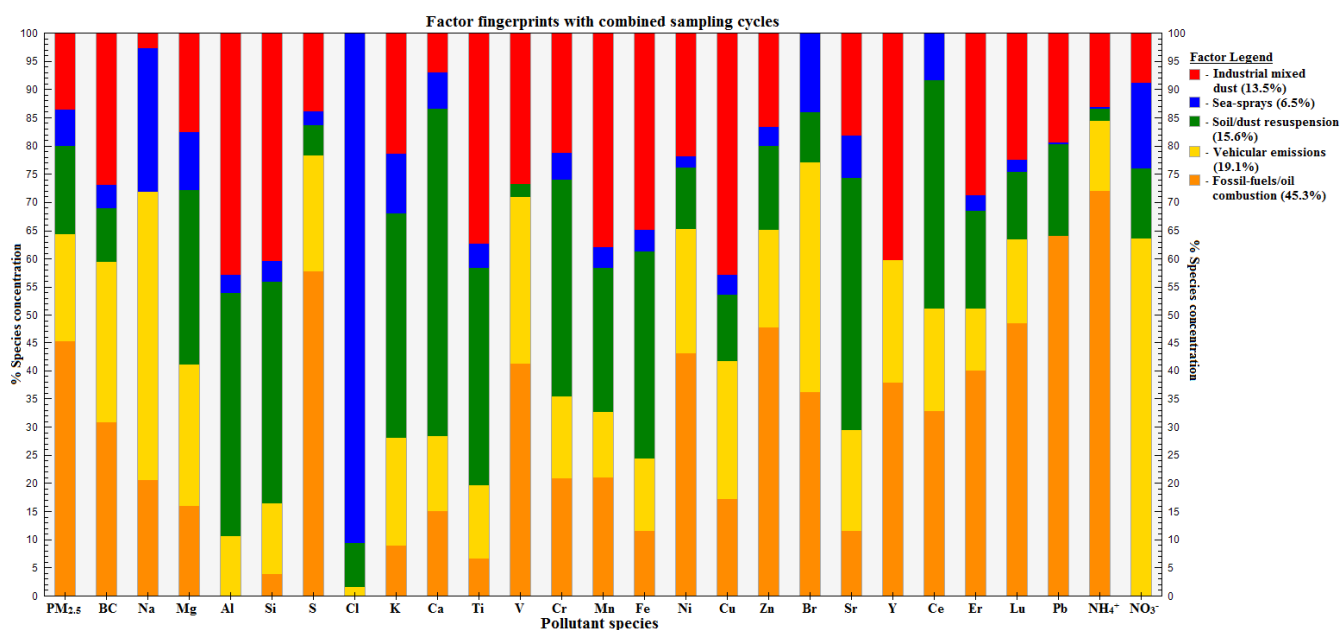

Figure S3. Factor fingerprints and contributions to the overall PM<sub>2.5</sub> in Jeddah—combined cycles.

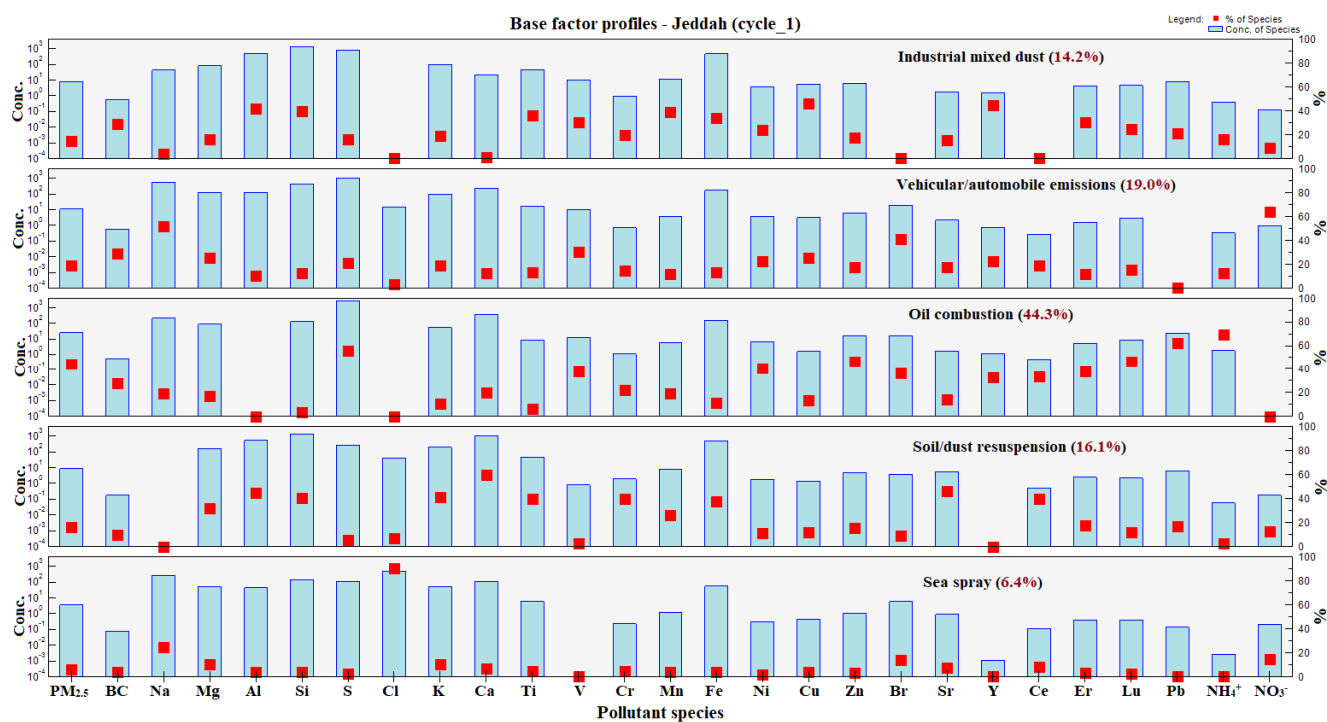

Figure S4. Base factor profiles and contributions to the overall PM<sub>2.5</sub>—Jeddah cycle 1.

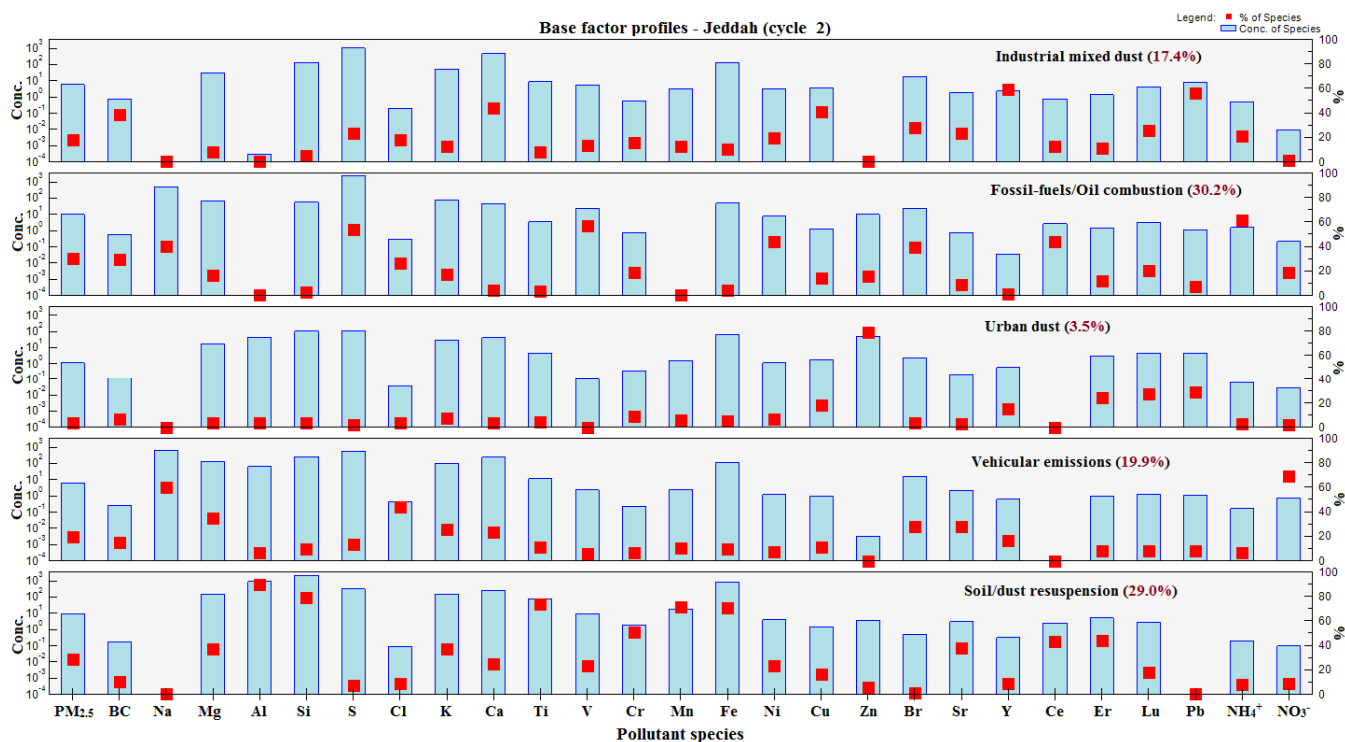Figure S5. Base factor profiles and contributions to the overall PM<sub>2.5</sub>—Jeddah cycle 2.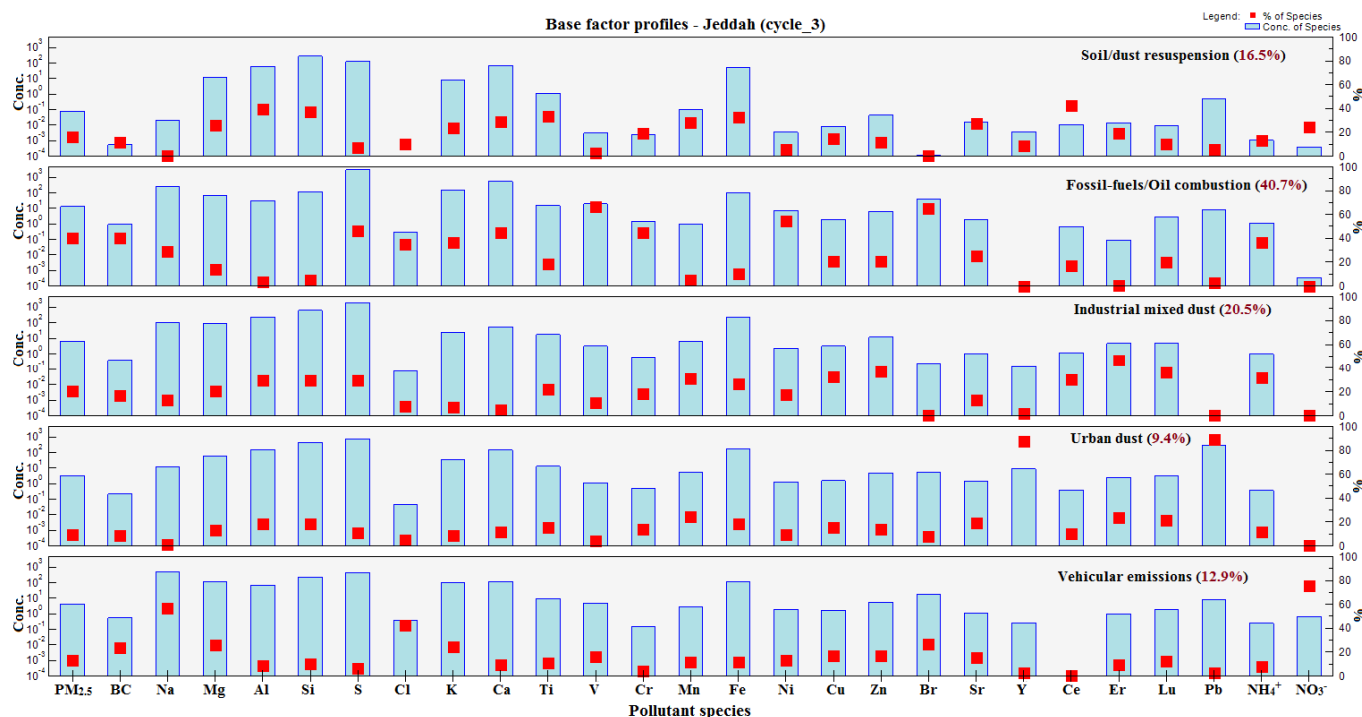Figure S6. Base factor profiles and contributions to the overall PM<sub>2.5</sub>—Jeddah cycle 3.

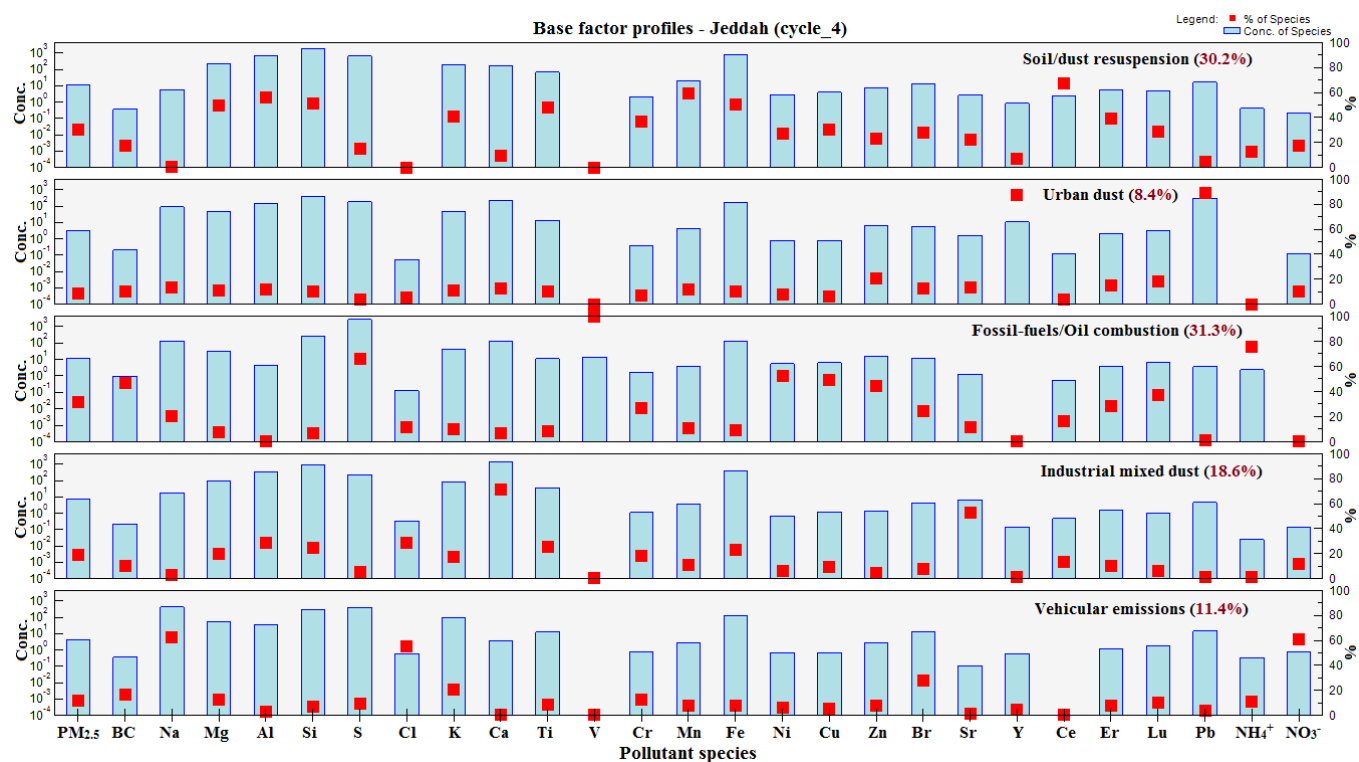

**Figure S7.** Base factor profiles and contributions to the overall PM<sub>2.5</sub>—Jeddah cycle 4.

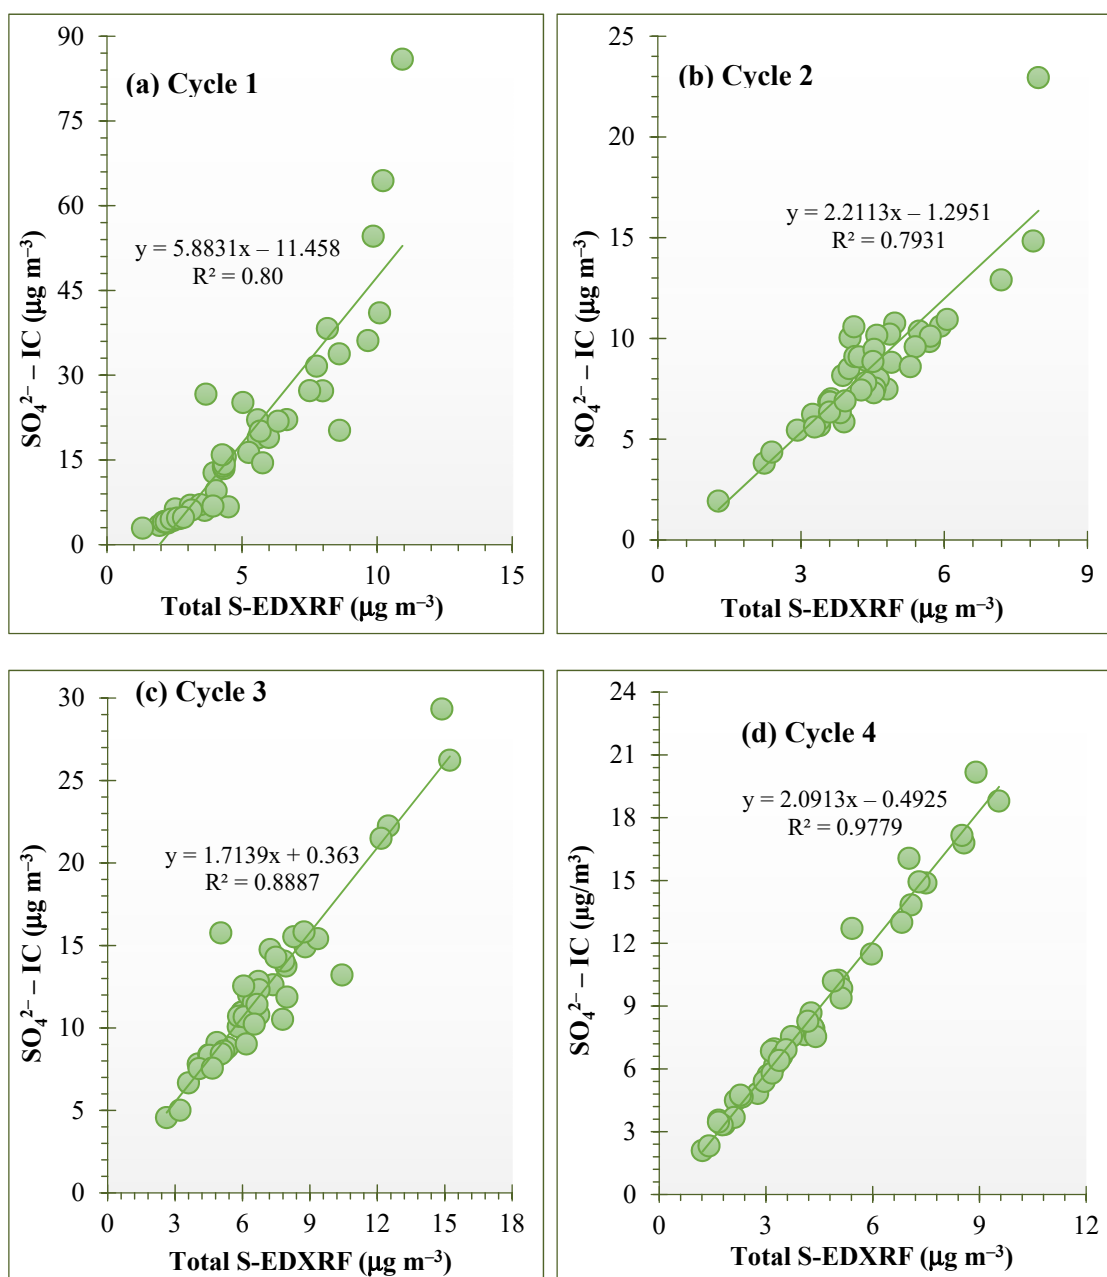

Figure S8. Plots of water-soluble  $\text{SO}_4^{2-}$  from IC analysis versus total S from ED-XRF analysis: cycle 1—(a); cycle 2—(b); cycle3—(c); cycle 4—(d).Backward-in-time trajectories

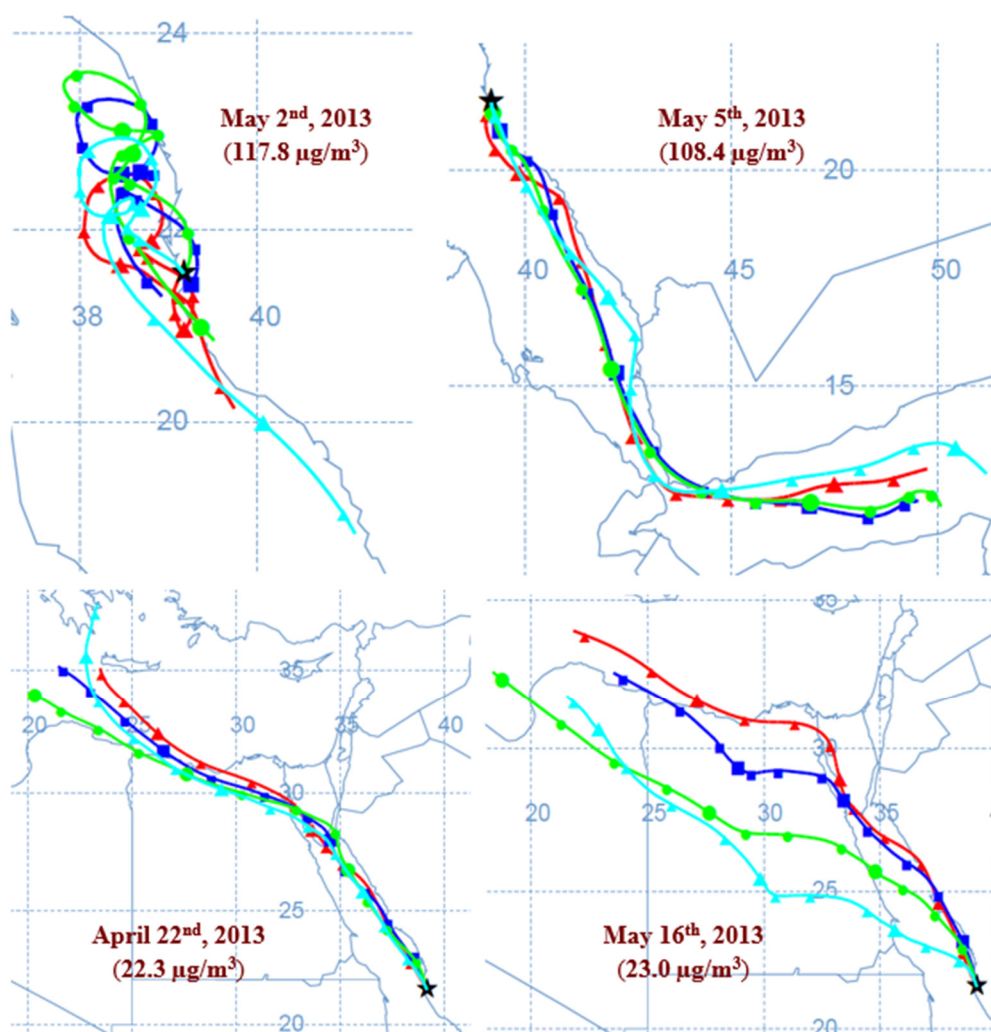

**Figure S9.** Plots of backward-in-time wind trajectories showing wind direction and its influence on daily PM<sub>2.5</sub> measured in Jeddah (cycle 1).

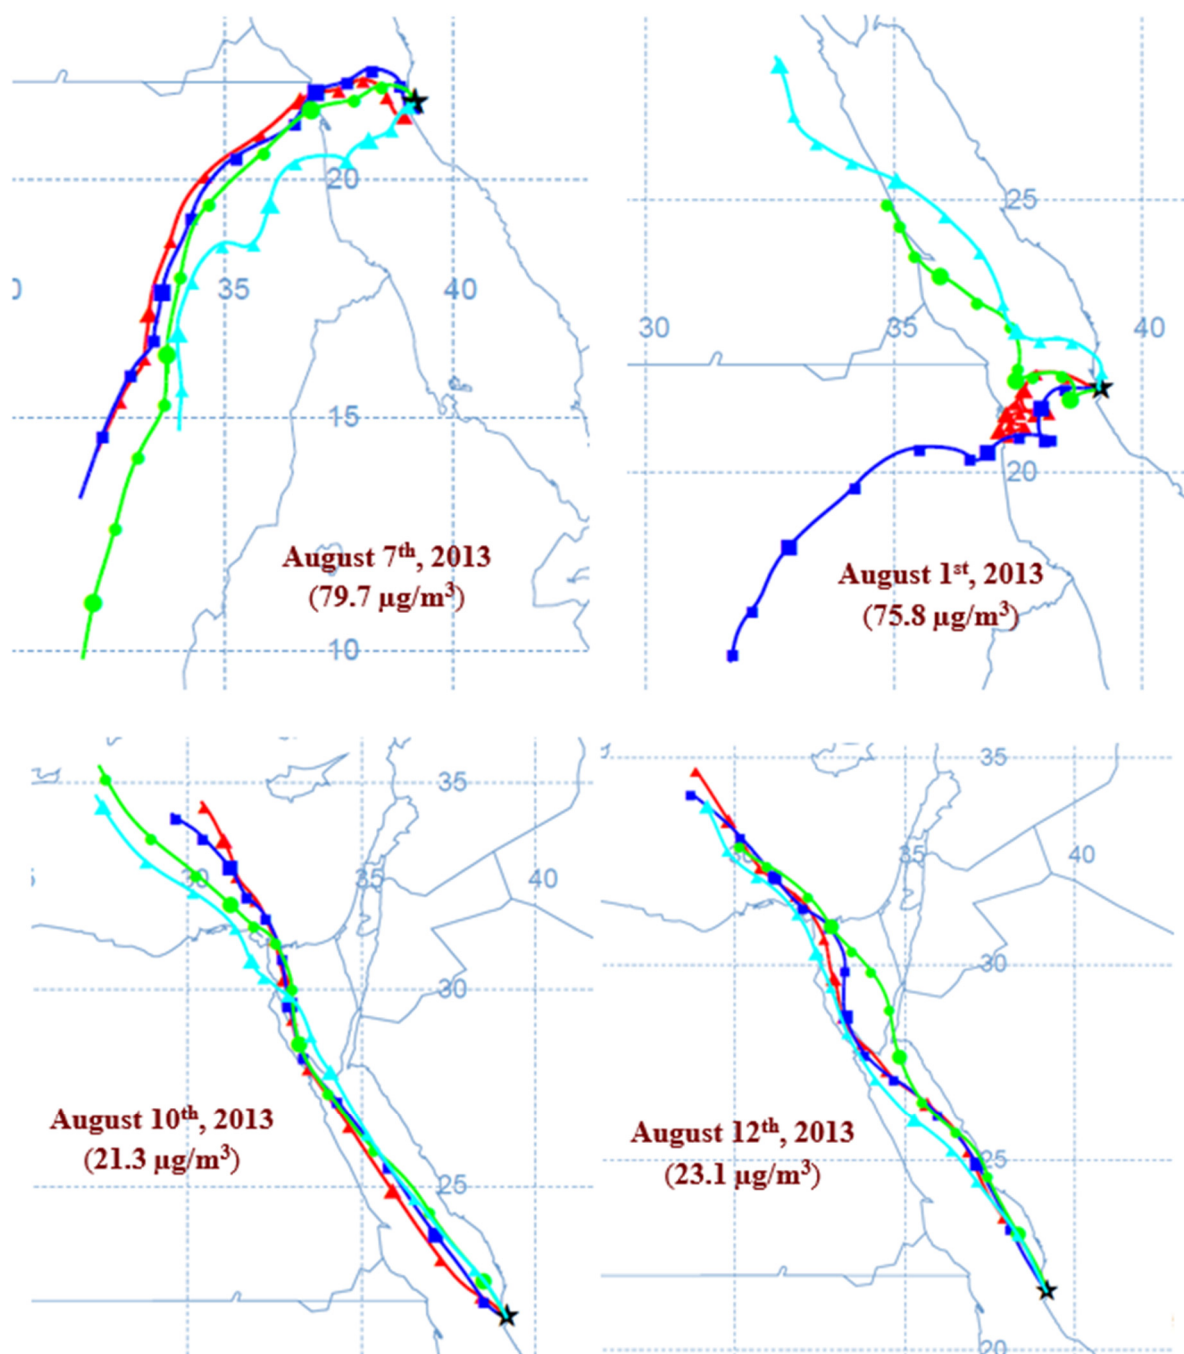

**Figure S10.** Plots of backward-in-time wind trajectories showing wind direction and its influence on daily PM<sub>2.5</sub> measured in Jeddah (cycle 2).

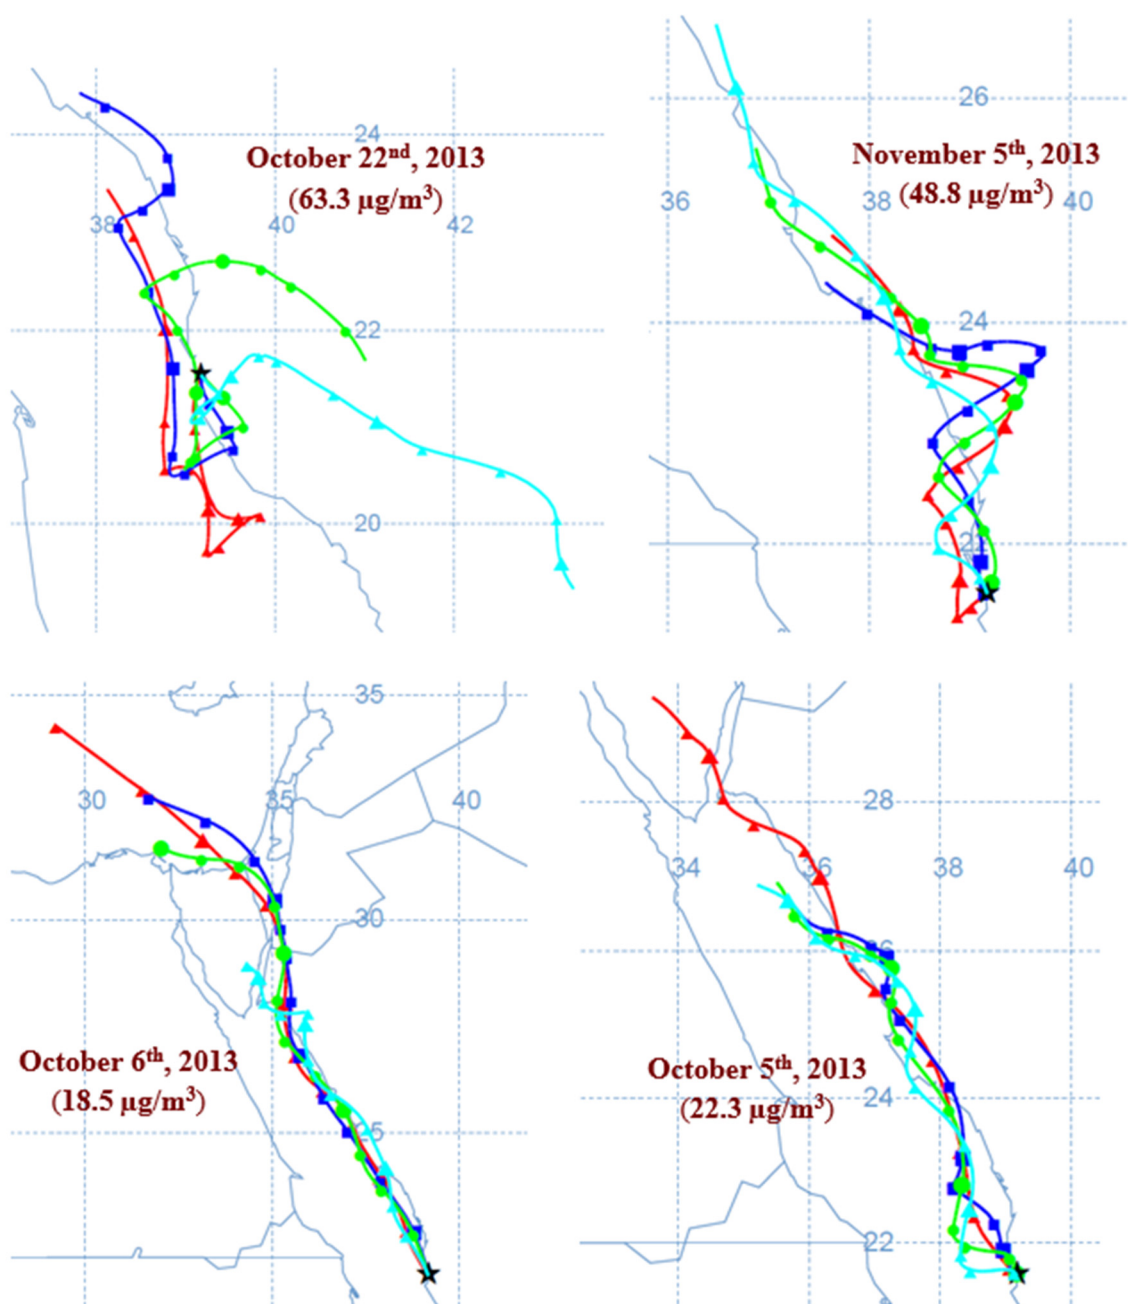

**Figure S11.** Plots of backward-in-time wind trajectories showing wind direction and its influence on daily PM<sub>2.5</sub> measured in Jeddah (cycle 3).

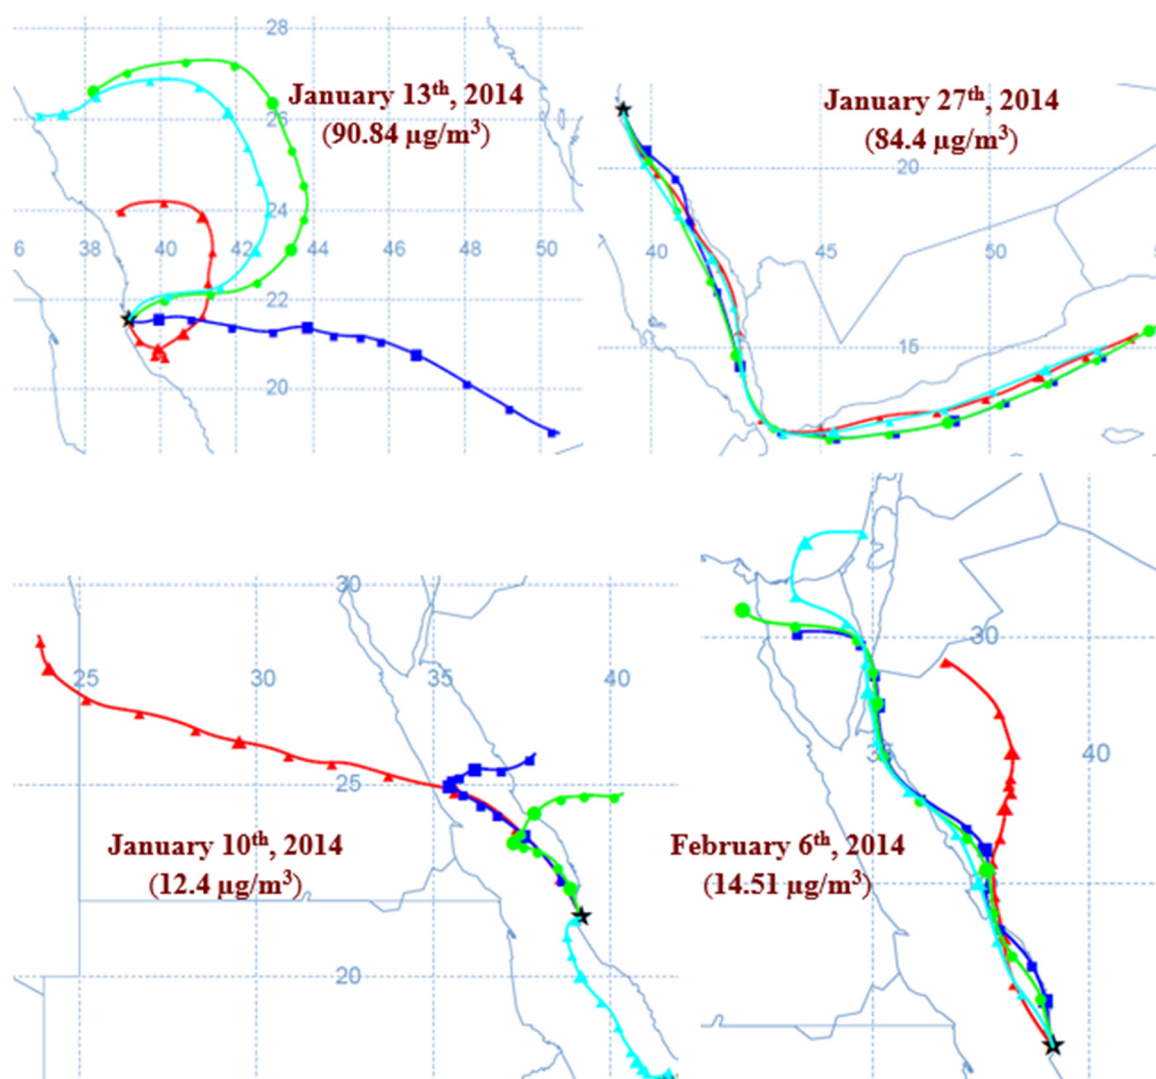

**Figure S12.** Plots of backward-in-time wind trajectories showing wind direction and its influence on daily PM<sub>2.5</sub> measured in Jeddah (cycle 4).

## References

1. Thermo-Scientific. *Analysis of Air Filters by ARL QUANT'X High Performance Energy Dispersive X-Ray Fluorescence Spectrometer (EDXRF)*, 2007. Available at: <https://www.thermofisher.com/document-connect/document-connect.html?url=https%3A%2F%2Fassets.thermofisher.com%2FTFS-Assets%2FMSD%2FAApplication-Notes%2FXRAN41964-air-filter-analysis-EDXRF.pdf> (accessed on 29 March 2022).
2. Zhao, X.; Zhang, X.; Xu, X.; Xu, J.; Meng, W.; Pu, W. Seasonal and diurnal variations of ambient PM<sub>2.5</sub> concentration in urban and rural environments in Beijing. *Atmos. Environ.* **2009**, *43*(18), 2893–2900, <https://doi.org/10.1016/j.atmosenv.2009.03.009>
3. Begum, B.A.; Hossain, A.; Nahar, N.; Markwitz, A.; Hopke, P.K. Organic and black carbon in PM<sub>2.5</sub> at an urban site at Dhaka, Bangladesh. *Aerosol Air Qual. Res.* **2012**, *12*(6), 1062–1072, <https://doi.org/10.4209/aaqr.2012.05.0138>.
4. Amarsaikhan, D.; Battengel, V.; Nergui, B.; Ganzorig, M.; Bolor, G. A Study on Air Pollution in Ulaanbaatar City, Mongolia. *J. Geosci. Env. Prot.* **2014**, *2*(02), 123, <http://dx.doi.org/10.4236/gep.2014.22017>.
5. Kulshrestha, A.; Satsangi, P.G.; Masih, J.; Taneja, A. Metal concentration of PM<sub>2.5</sub> and PM<sub>10</sub> particles and seasonal variations in urban and rural environment of Agra, India. *Sci. Total Environ.* **2009**, *407*, 6196–6204, <https://doi.org/10.1016/j.scitotenv.2009.08.050>.
6. Hamad, S.H.; Schauer, J.J.; Heo, J.; Kadhim, A.K.H. Source apportionment of PM<sub>2.5</sub> carbonaceous aerosol in Baghdad, Iraq. *Atmos. Res.* **2015**, *156*, 80–90, <https://doi.org/10.1016/j.atmosres.2014.12.017>.
7. Yatkin, S.; Bayram, A. Source apportionment of PM<sub>10</sub> and PM<sub>2.5</sub> using positive matrix factorization and chemical mass balance in Izmir, Turkey. *Sci. Total Environ.* **2008**, *390*, 109–123, <https://doi.org/10.1016/j.scitotenv.2007.08.059>.
8. Kermani, M.; Arfaeinia, H.; Nabizadeh, R.; Alimohammadi, M.; Aalamolhoda, A. Levels of PM<sub>2.5</sub>—associated heavy metals in the ambient air of Sina hospital district, Tehran, Iran. *J. Air Pollut. Health* **2015**, *1*(1), 1–6.



9. Nayebar, S.R.; Aburizaiza, O.S.; Khwaja, H.A.; Siddique, A.; Hussain, M.M.; Zeb, J.; Khatib, F.; Carpenter, D.O.; Blake, D.R. Chemical Characterization and Source Apportionment of PM<sub>2.5</sub> in Rabigh, Saudi Arabia. *Aerosol Air Qual. Res.* **2016**, *16*(12), 3114–3129, <https://doi.org/10.4209/aaqr.2015.11.0658>.
10. Brown, K.W.; Bouhamra, W.; Lamoureux, D.P.; Evans, J.S.; Koutrakis, P. Characterization of Particulate Matter for Three Sites in Kuwait. *J. Air Waste Manag. Assoc.* **2008**, *58*, 994–1003, <https://doi.org/10.3155/1047-3289.58.8.994>.
11. Degobbi, C.; Lopes, F.D.; Carvalho-Oliveira, R.; Muñoz, J.E.; Saldiva, P.H. Correlation of fungi and endotoxin with PM<sub>2.5</sub> and meteorological parameters in atmosphere of Sao Paulo, Brazil. *Atmospheric Environ.* **2010**, *45*, 2277–2283, <https://doi.org/10.1016/j.atmosenv.2010.12.005>.
12. Akyuz, M.; Cabuk, H. Meteorological variations of PM<sub>2.5</sub>/PM<sub>10</sub> concentrations and particle-associated polycyclic aromatic hydrocarbons in the atmospheric environment of Zonguldak, Turkey. *J. Hazard Mater.* **2009**, *170*(1), 13–21, <https://doi.org/10.1016/j.jhazmat.2009.05.029>.
13. Nakhle, M.M.; Farah, W.; Ziade, N.; Abboud, M.; Coussa-Koniski, M.L.; Annesi-Maesano, I. Beirut Air Pollution and Health Effects—BAPHE study protocol and objectives. *Multidiscip. Respir. Med.* **2015**, *10*(1), 21, <https://doi.org/10.1186/s40248-015-0016-1>.
14. Hueglin, C.; Gehrig, R.; Baltensperger, U.; Gysel, M.; Monn, C.; Vonmont, H. Chemical characterization of PM<sub>2.5</sub>, PM<sub>10</sub> and coarse particles at urban, near-city and rural sites in Switzerland. *Atmos. Environ.* **2005**, *39*(4), 637–651, <https://doi.org/10.1016/j.atmosenv.2004.10.027>.
15. Pateraki, S.; Assimakopoulos, V.; Maggos, T.; Fameli, K.; Kotroni, V.; Vasilakos, C. Particulate matter pollution over a Mediterranean urban area. *Sci. Total Environ.* **2013**, *463–464*, 508–524, <https://doi.org/10.1016/j.scitotenv.2013.05.076>.
16. Khan, M.F.; Shirasuna, Y.; Hirano, K.; Masunaga, S. Characterization of PM<sub>2.5</sub>, PM<sub>2.5–10</sub> and PM<sub>10</sub> in ambient air, Yokohama, Japan. *Atmos. Res.* **2010**, *96*(1), 159–172, <https://doi.org/10.1016/j.atmosres.2009.12.009>.
17. Bell, M.L.; Dominici, F.; Ebisu, K.; Zeger, S.L.; Samet, J.M. Spatial and Temporal Variation in PM<sub>2.5</sub> Chemical Composition in the United States for Health Effects Studies. *Environ. Health Perspect.* **2007**, *115*(7), 989–995, <https://doi.org/10.1289/ehp.9621>.
18. Anderson, H.R.; A.; Bremner, S.; Atkinson, R.W.; Harrison, R.M.; Walters, S. Particulate matter and daily mortality and hospital admissions in the west midlands conurbation of the United Kingdom: Associations with fine and coarse particles, black smoke and sulphate. *Occup. Environ. Med.* **2001**, *58*, 504–510, <https://doi.org/10.1136/oem.58.8.504>.
19. Sillanpää, M.; Frey, A.; Hillamo, R.; Pennanen, A.S.; Salonen, R.O. Organic, elemental and inorganic carbon in particulate matter of six urban environments in Europe. *Atmospheric Chem. Phys.* **2005**, *5*, 2869–2879, <https://doi.org/10.5194/acp-5-2869-2005>.
