# Supplementary material
Source: MDPI journal article supplement (https://www.mdpi.com/2073-4433/13/5/711)
Supplement: s1 [file s1]

## Source ★ at 21.54 N 39.17 E

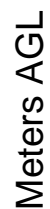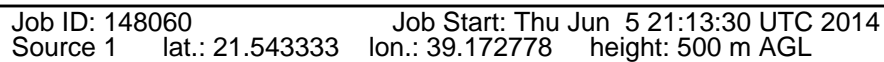

Trajectory Direction: Backward      Duration: 72 hrs  
Vertical Motion Calculation Method:      Isobaric  
Meteorology: 0000Z 8 Jan 2014 - GDAS1
