# Supplementary material
Source: MDPI journal article supplement (https://www.mdpi.com/2073-4433/13/5/711)

NOAA HYSPLIT MODEL  
Backward trajectories ending at 0800 UTC 13 Jan 14  
GDAS Meteorological Data

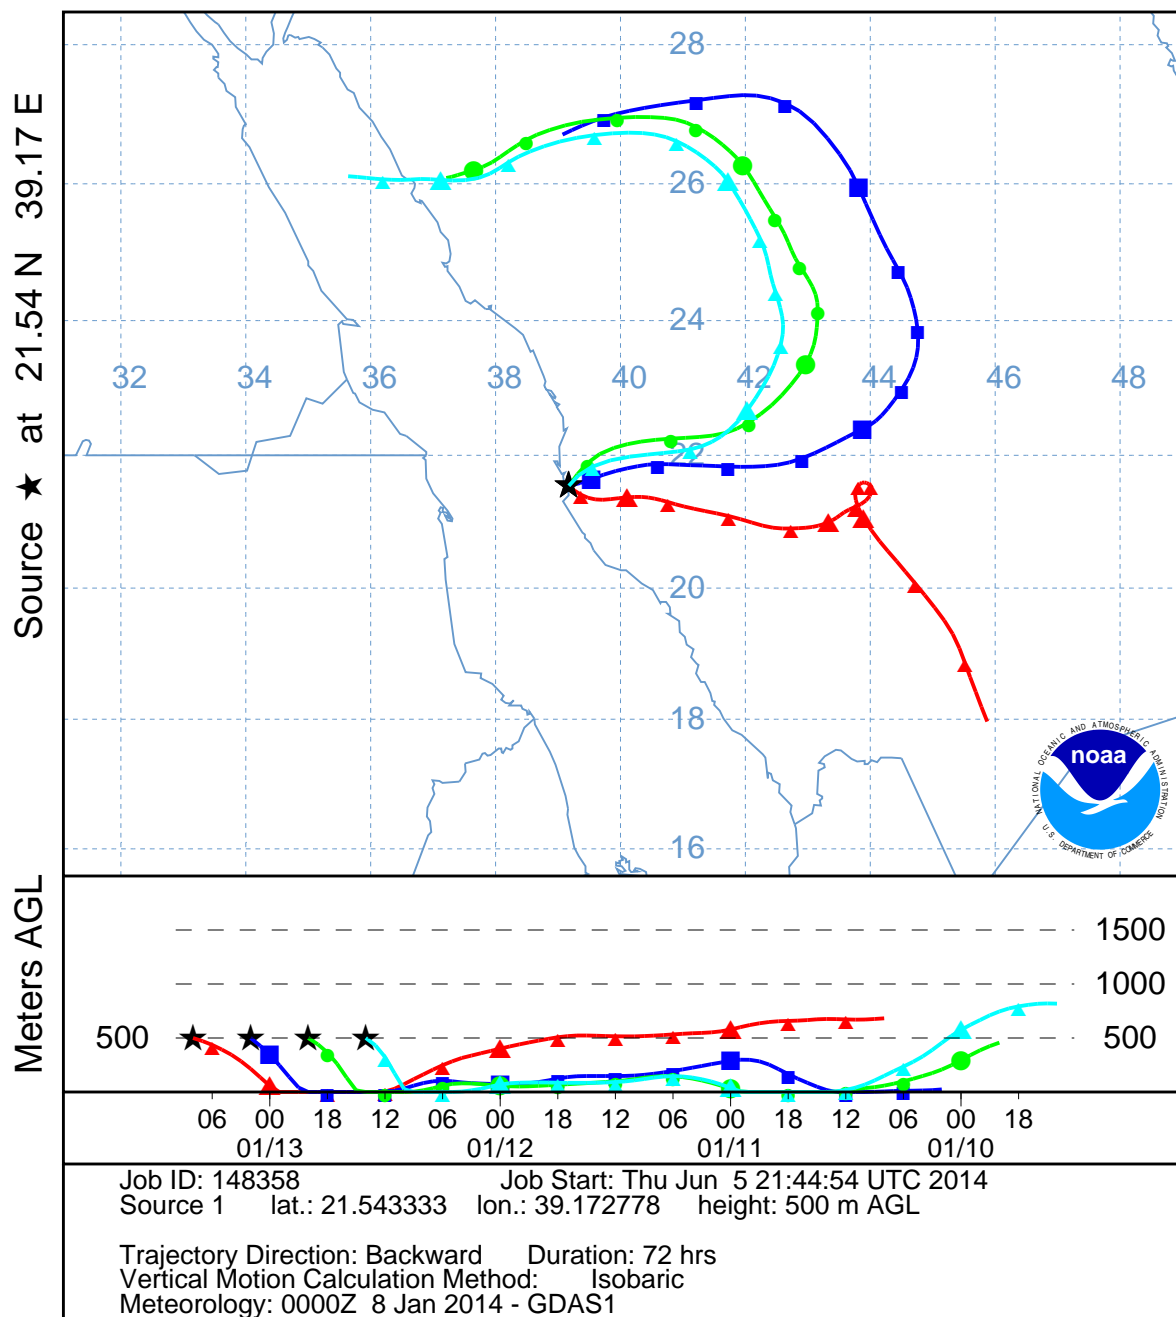

Supplement: s1 [file s1]

NOAA HYSPLIT MODEL  
Backward trajectories ending at 1400 UTC 05 May 13  
GDAS Meteorological Data

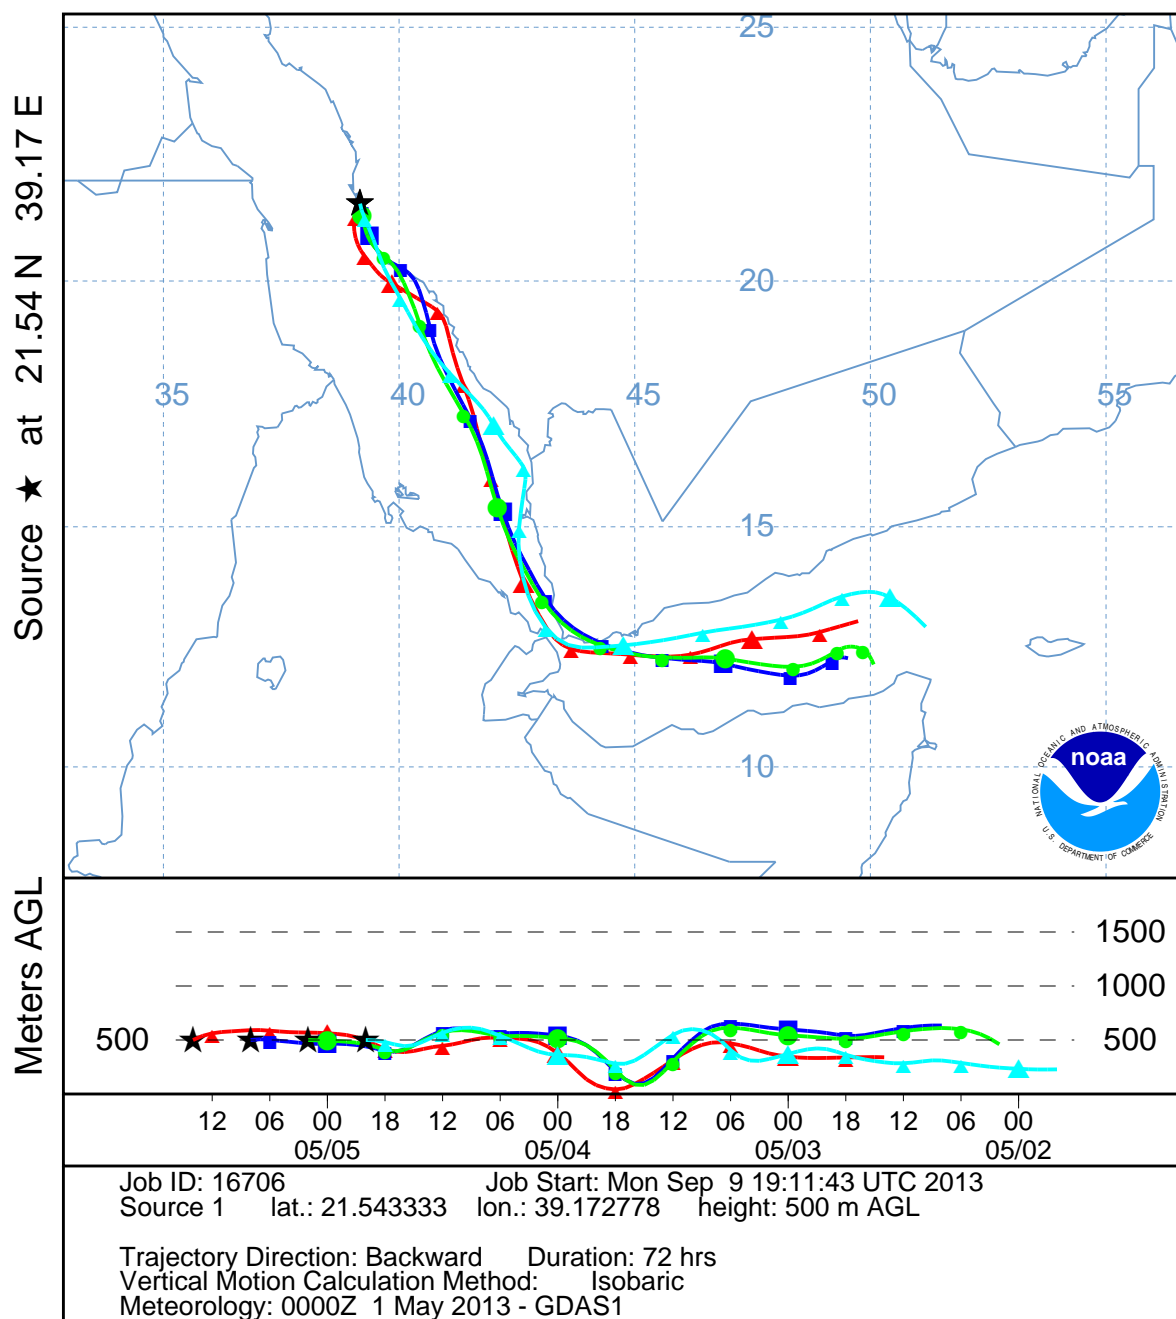

Supplement: s1 [file s1]

NOAA HYSPLIT MODEL  
Backward trajectories ending at 1100 UTC 16 May 13  
GDAS Meteorological Data

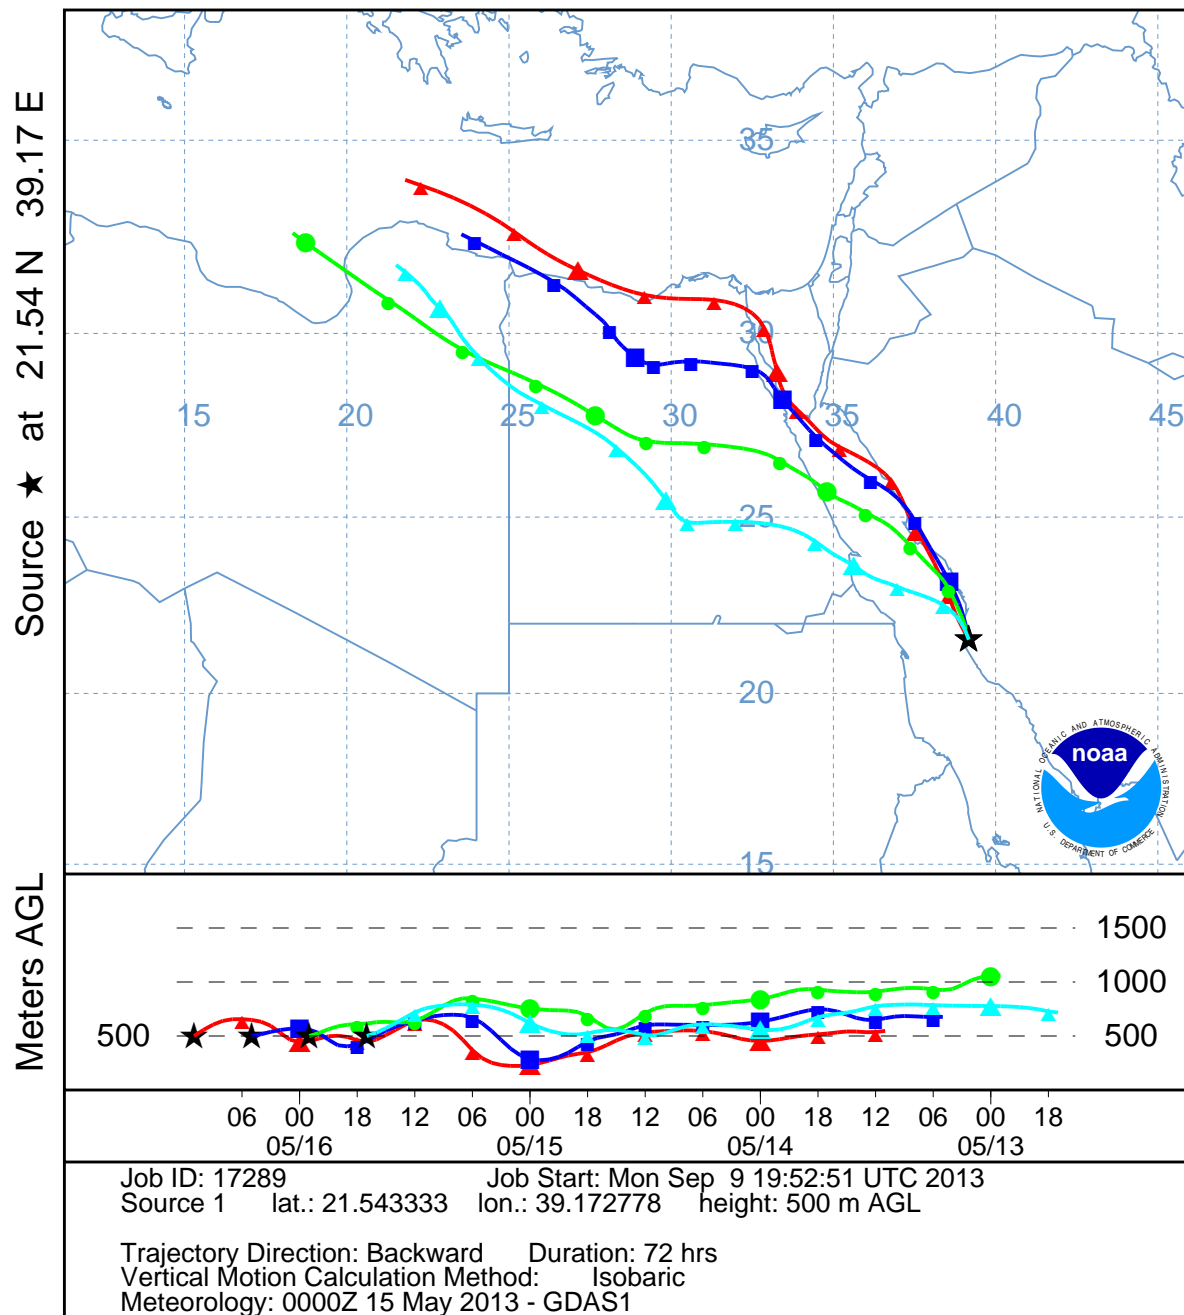

Supplement: s1 [file s1]

NOAA HYSPLIT MODEL  
Backward trajectories ending at 1100 UTC 02 May 13  
GDAS Meteorological Data

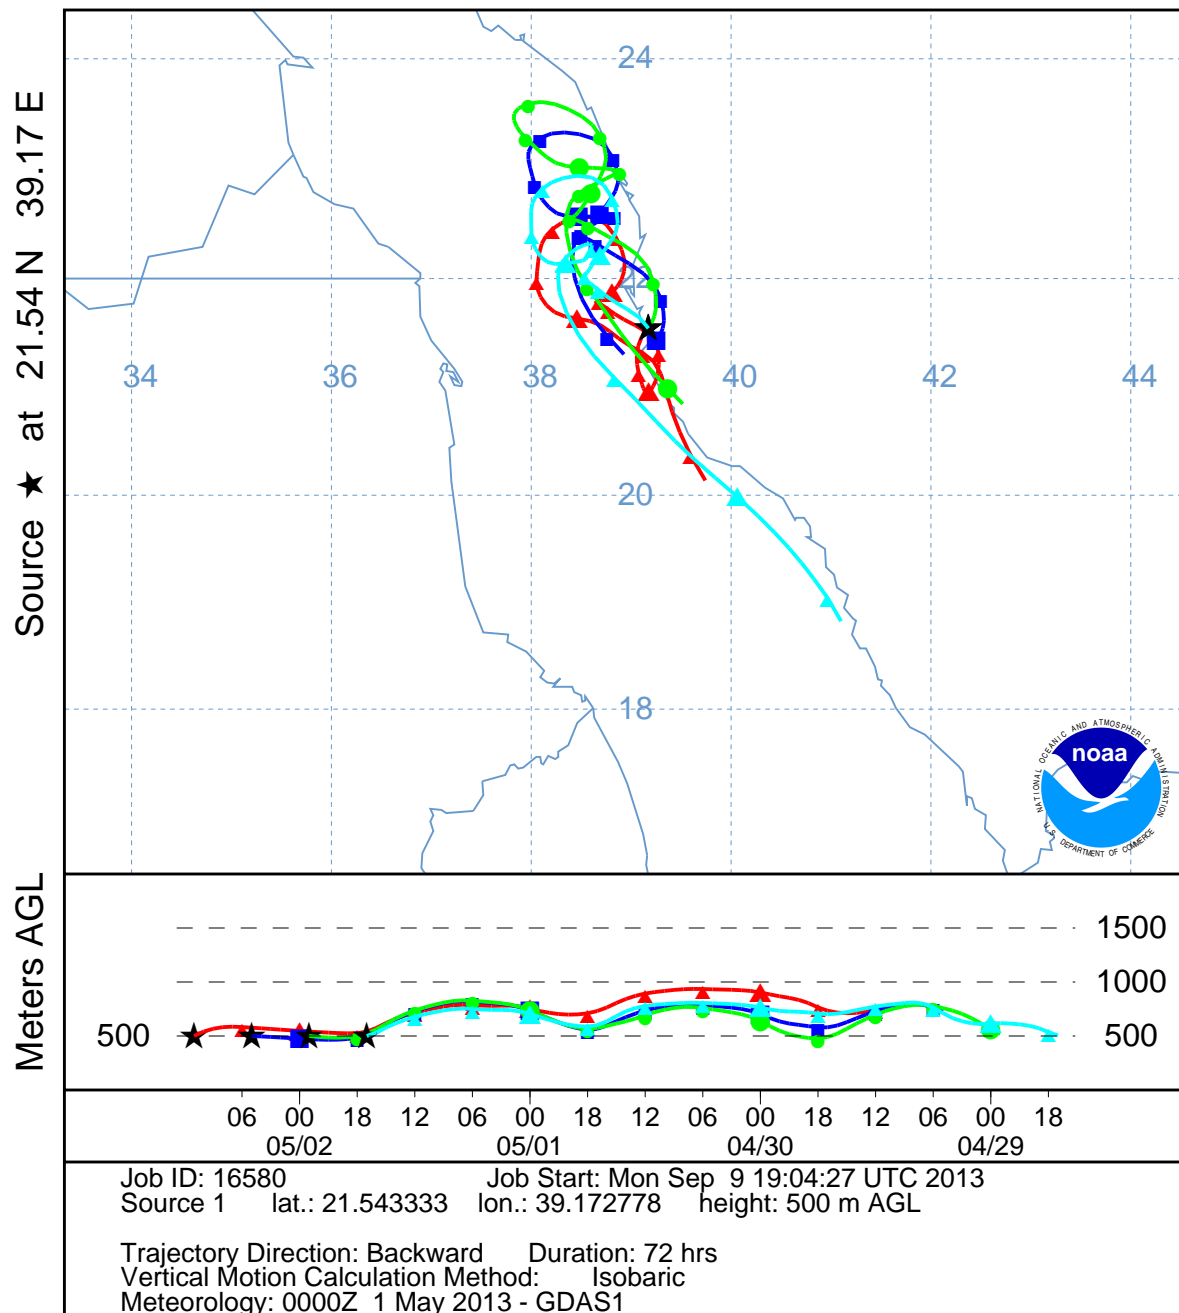

Supplement: s1 [file s1]

NOAA HYSPLIT MODEL  
Backward trajectories ending at 0300 UTC 10 Aug 13  
GDAS Meteorological Data

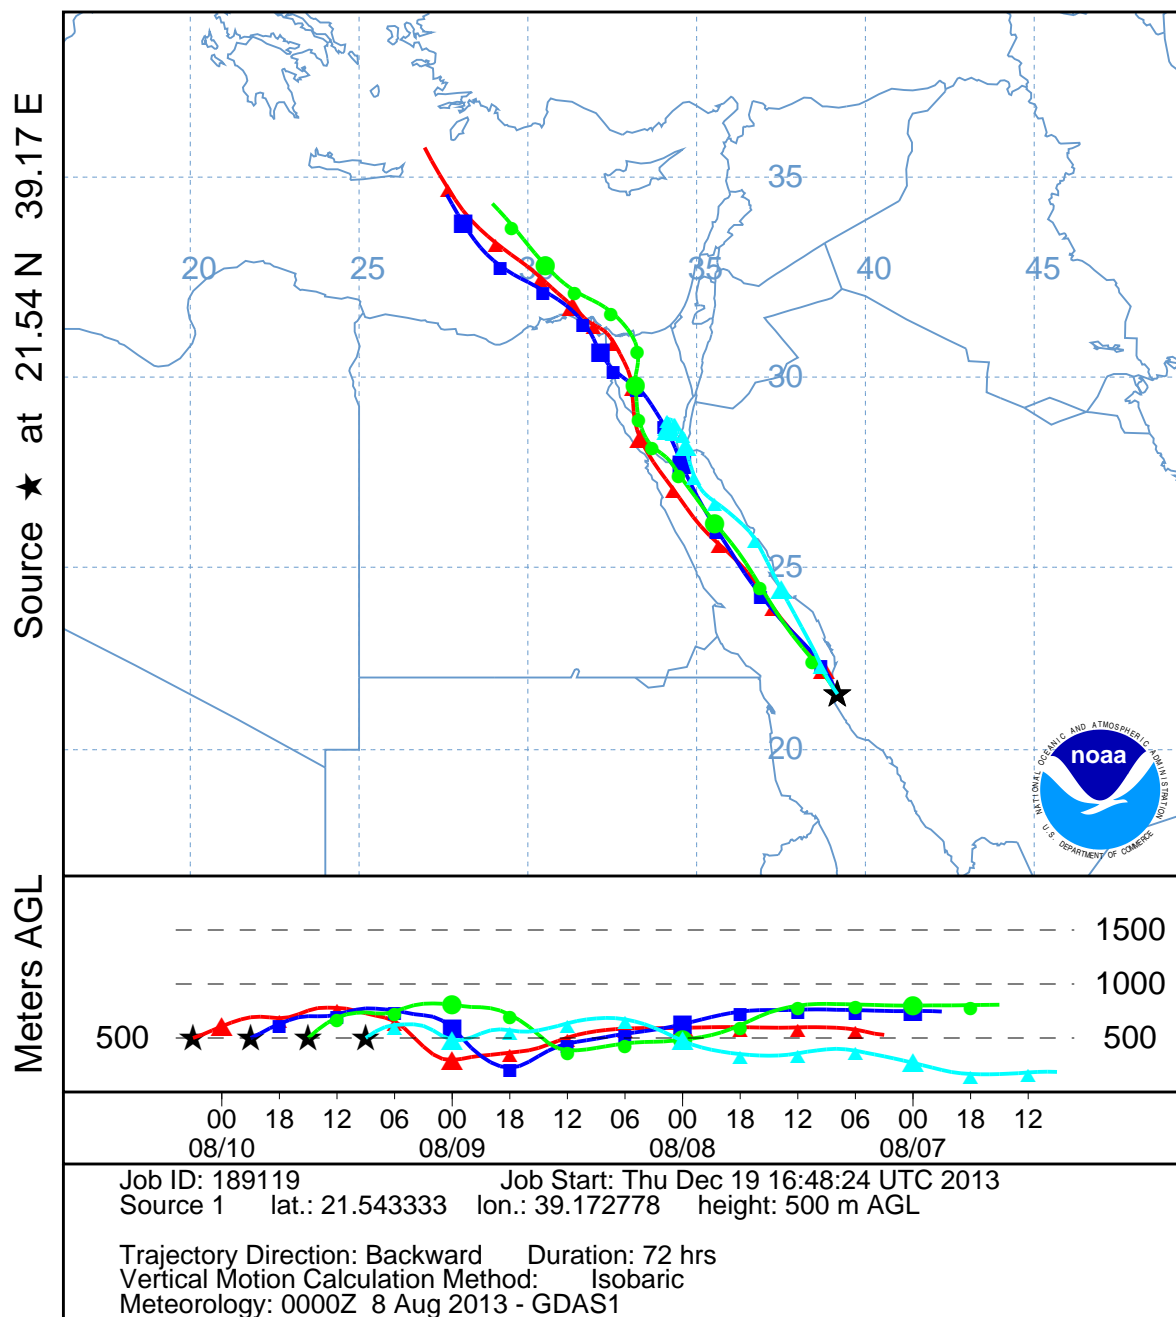

Supplement: s1 [file s1]

NOAA HYSPLIT MODEL  
Backward trajectories ending at 1200 UTC 22 Oct 13  
GDAS Meteorological Data

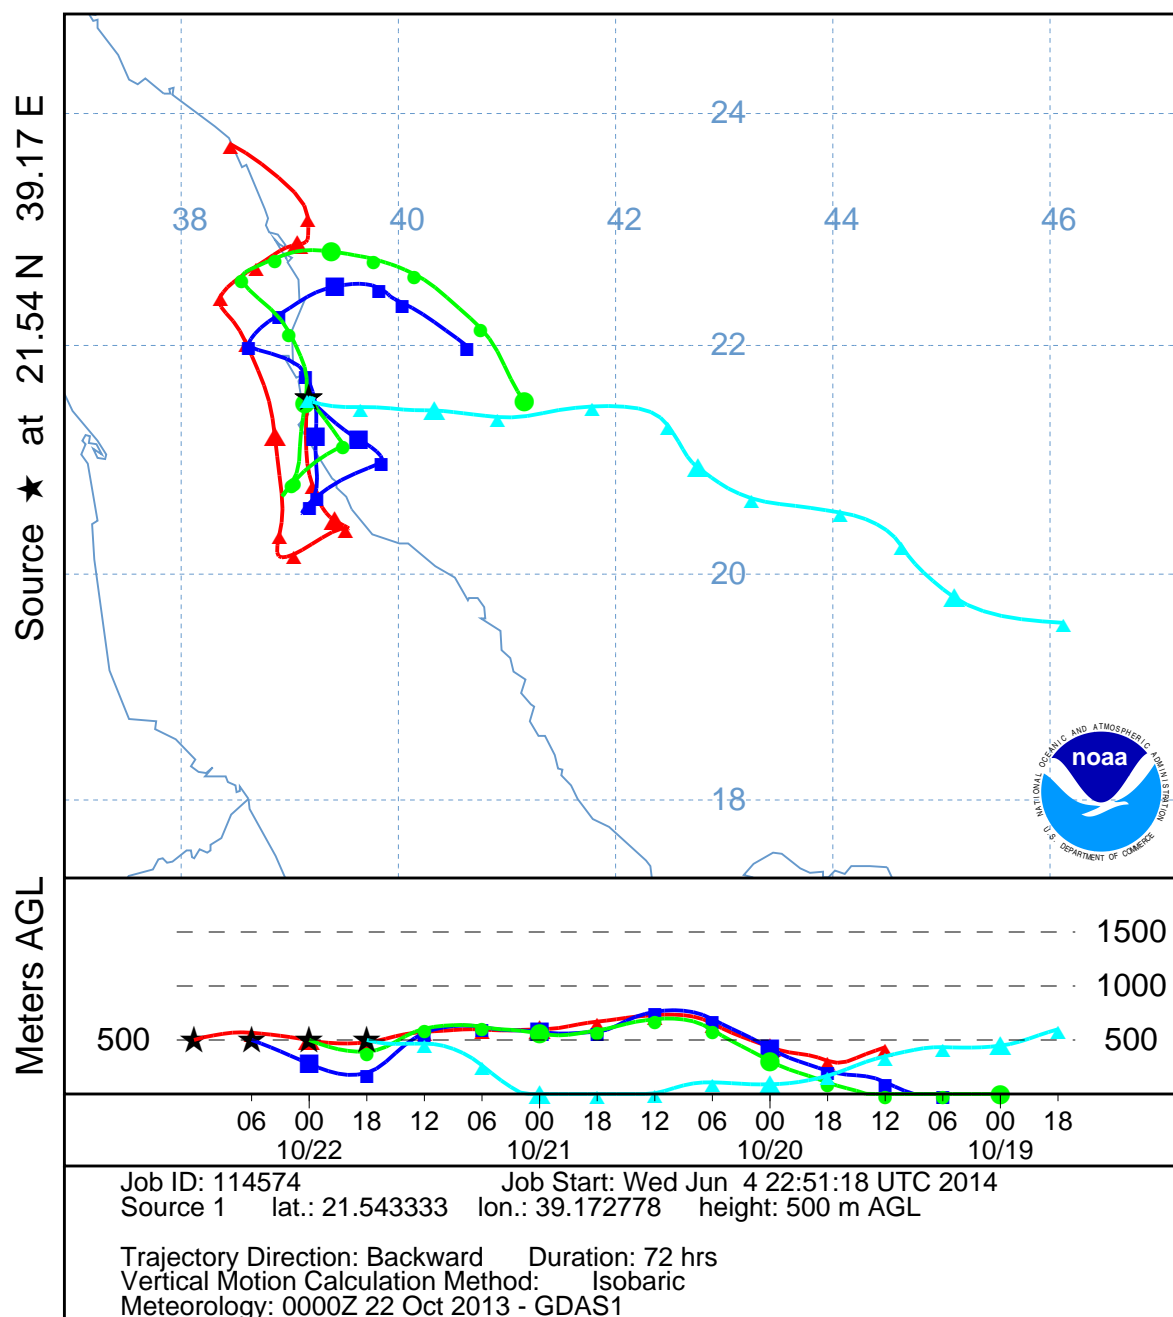

Supplement: s1 [file s1]

NOAA HYSPLIT MODEL  
Backward trajectories ending at 1100 UTC 05 Nov 13  
GDAS Meteorological Data

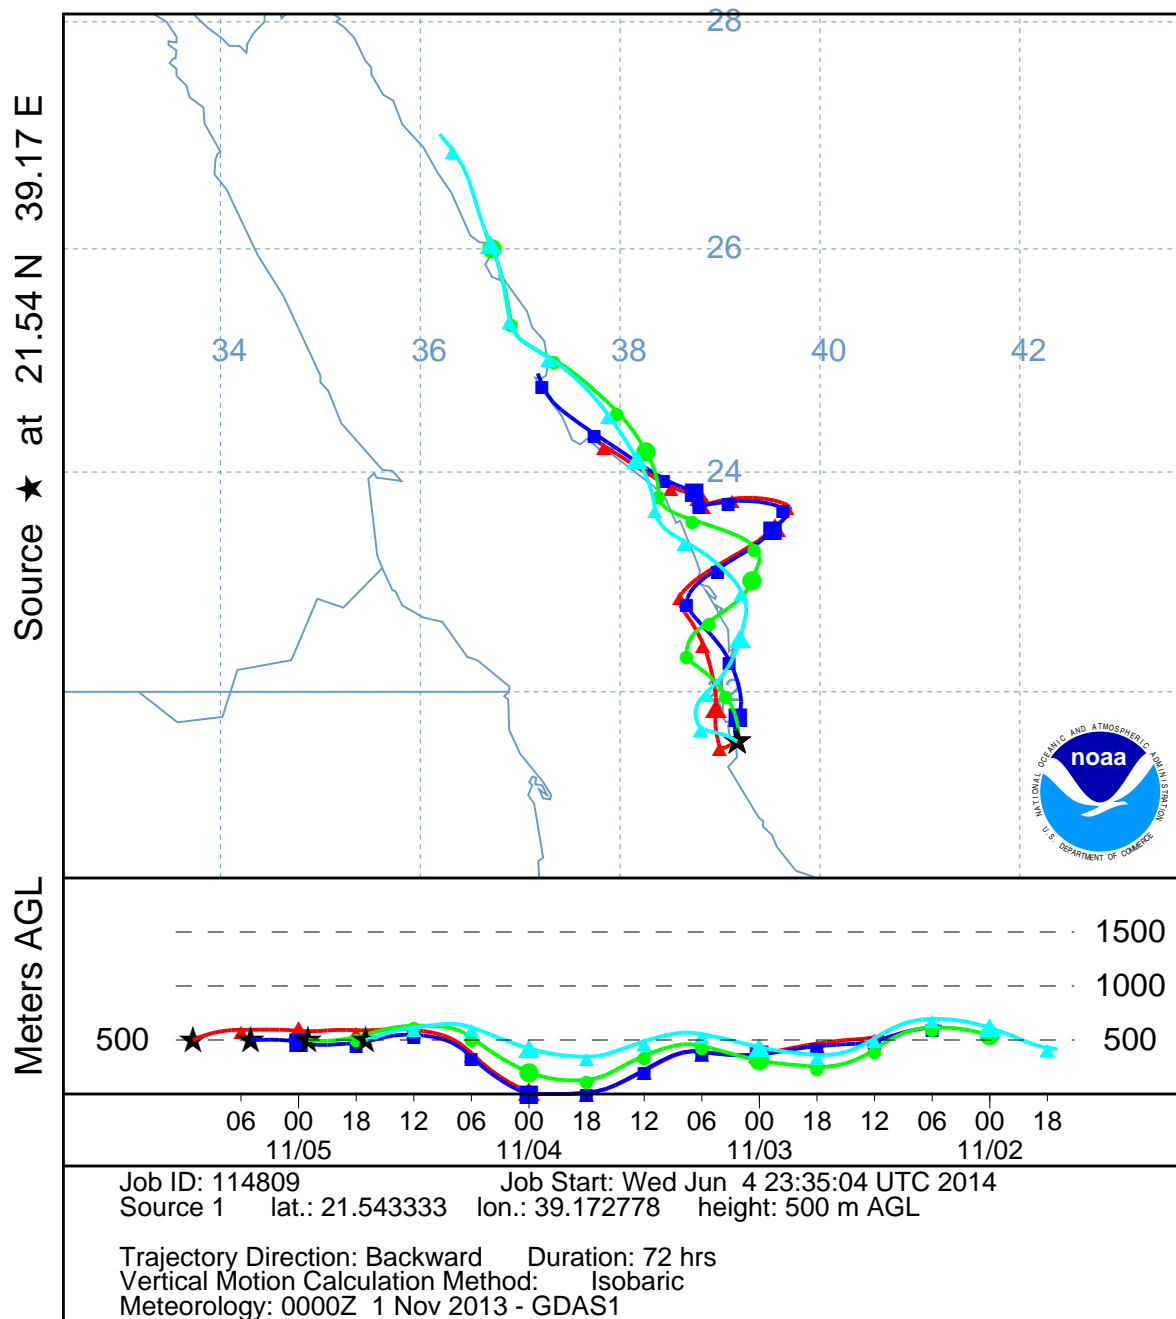

Supplement: s1 [file s1]

NOAA HYSPLIT MODEL  
Backward trajectories ending at 0400 UTC 07 Aug 13  
GDAS Meteorological Data

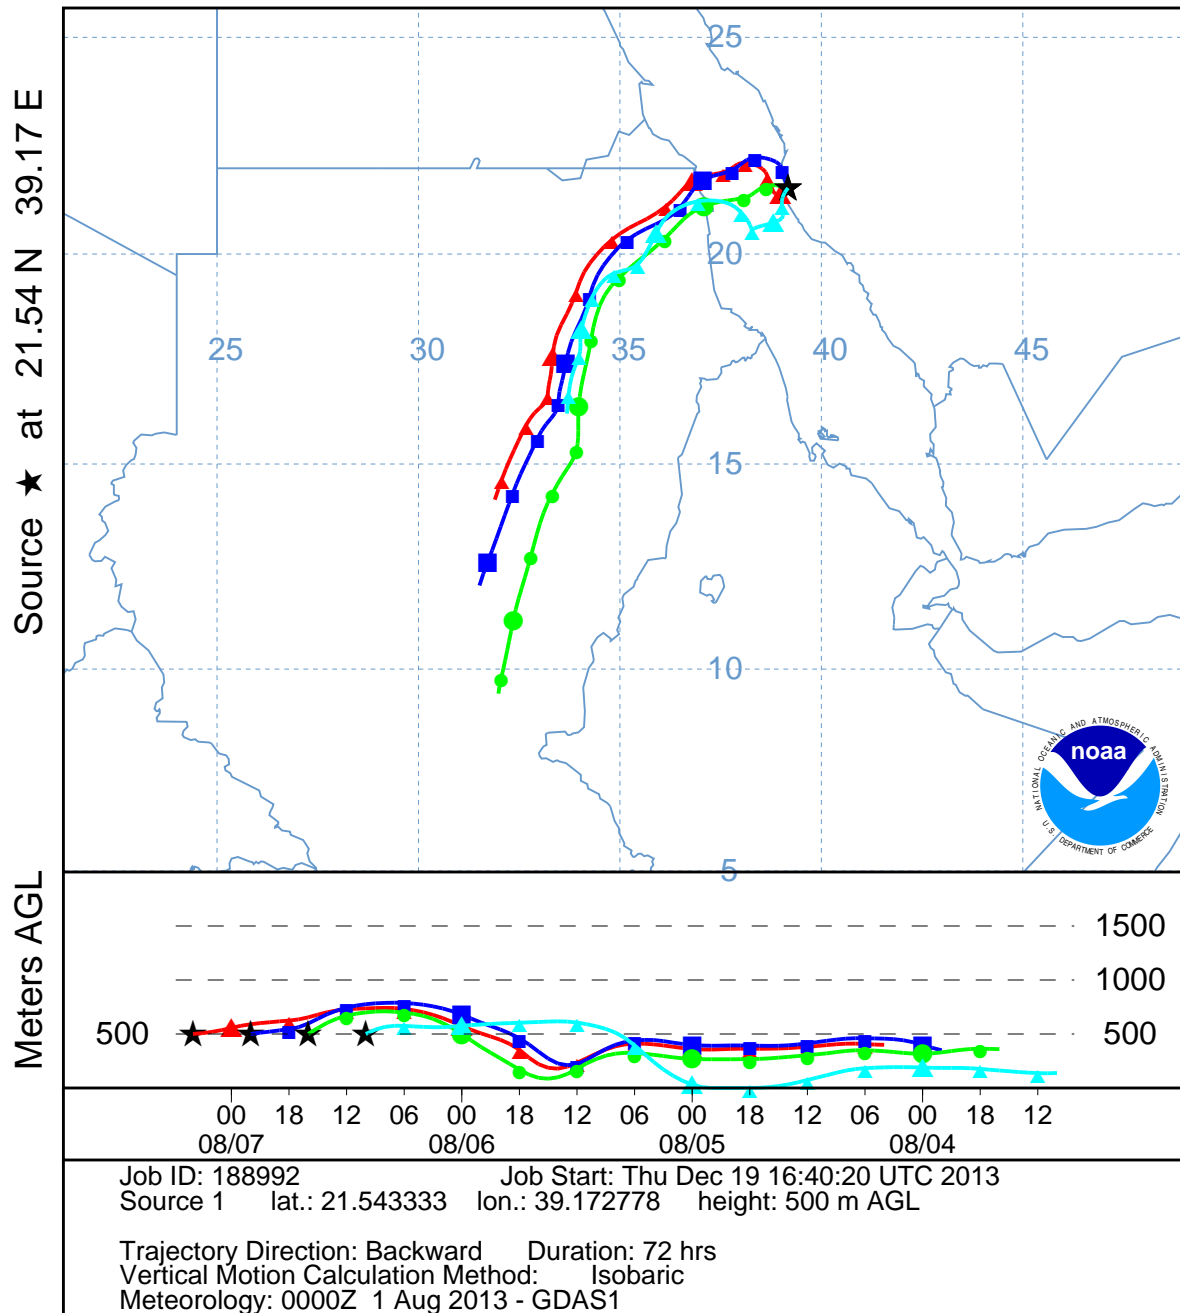

Supplement: s1 [file s1]

NOAA HYSPLIT MODEL  
Backward trajectories ending at 0900 UTC 06 Oct 13  
GDAS Meteorological Data

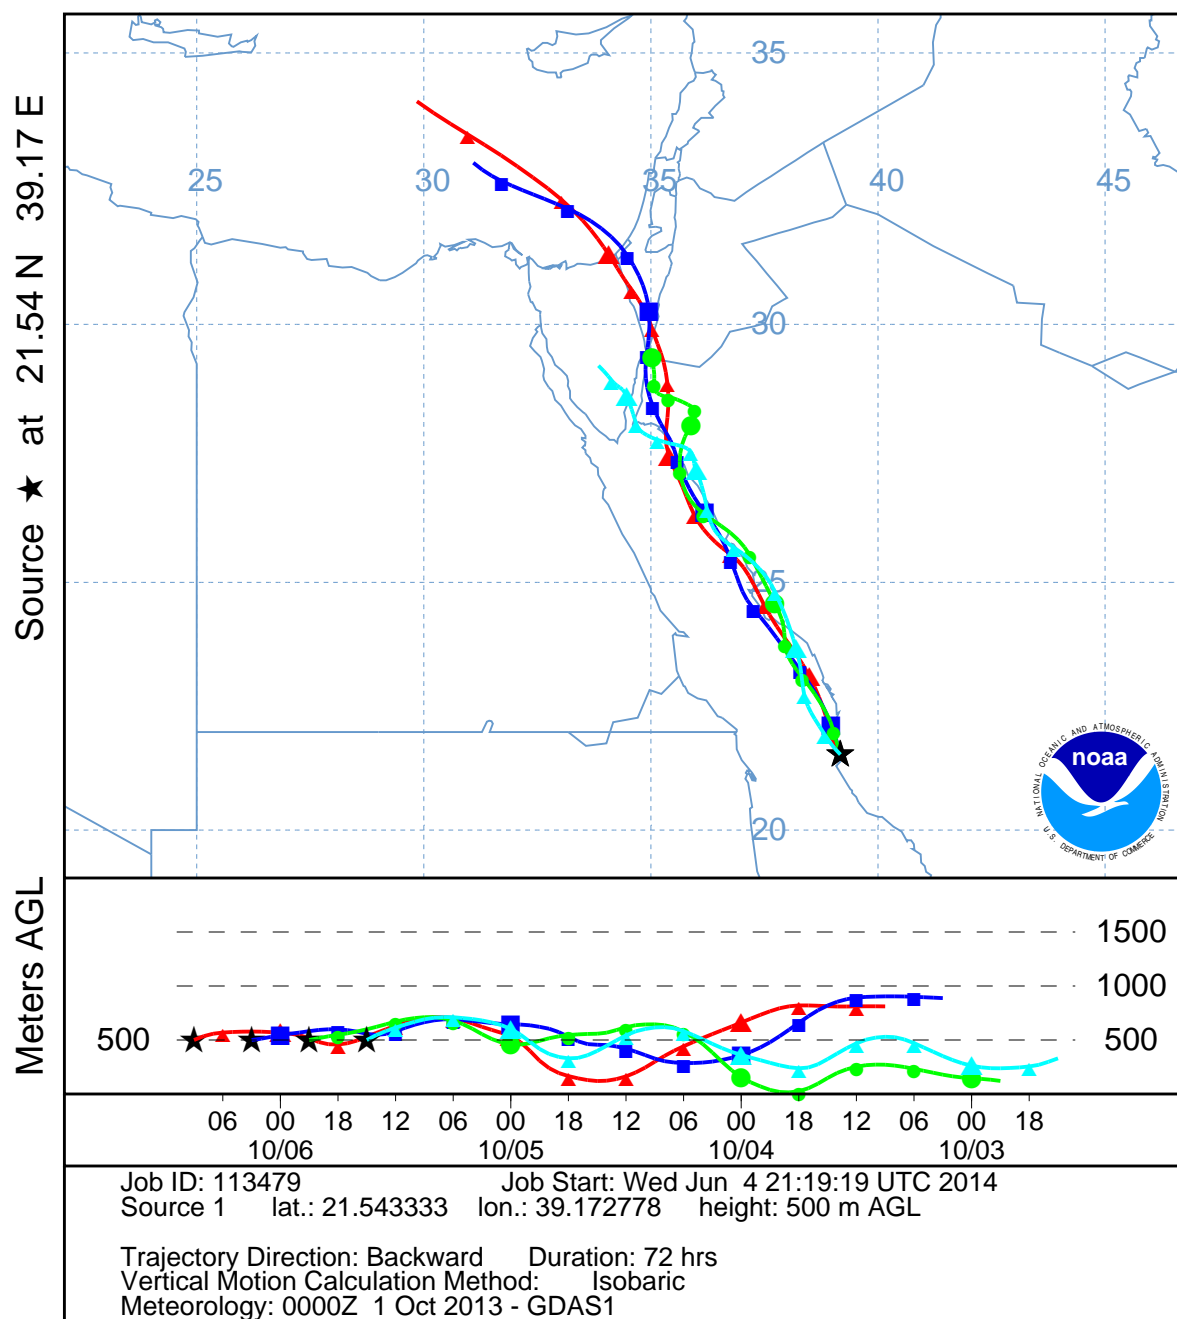

Supplement: s1 [file s1]

NOAA HYSPLIT MODEL  
Backward trajectories ending at 1000 UTC 05 Oct 13  
GDAS Meteorological Data

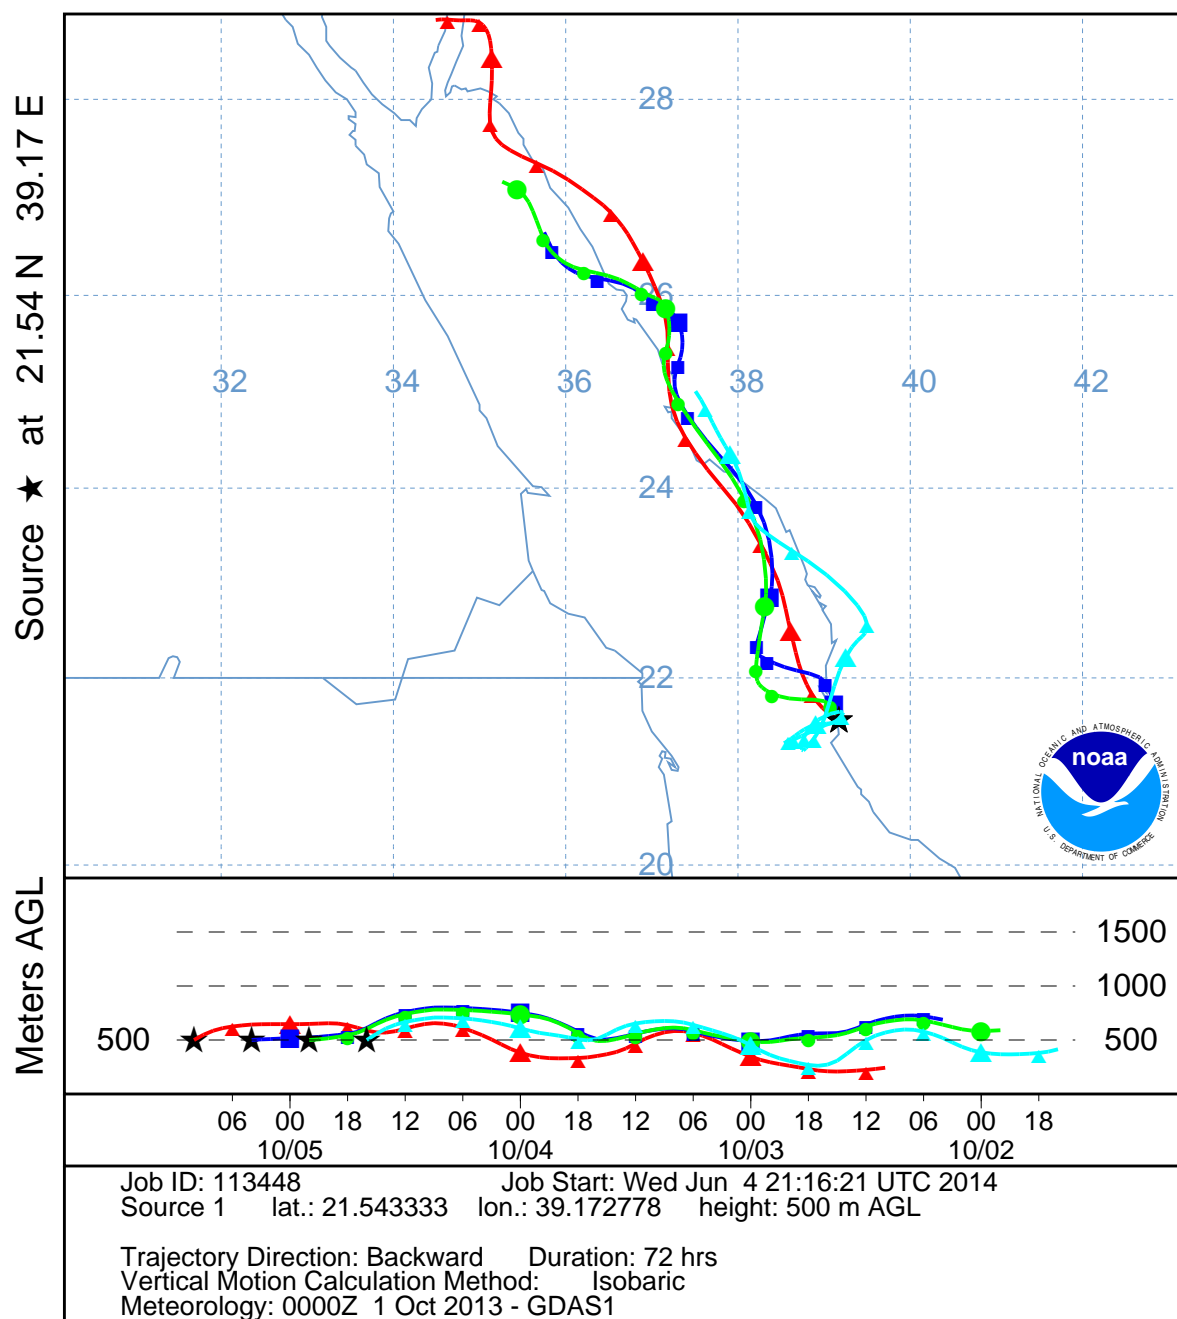

Supplement: s1 [file s1]

NOAA HYSPLIT MODEL  
Backward trajectories ending at 0300 UTC 01 Aug 13  
GDAS Meteorological Data

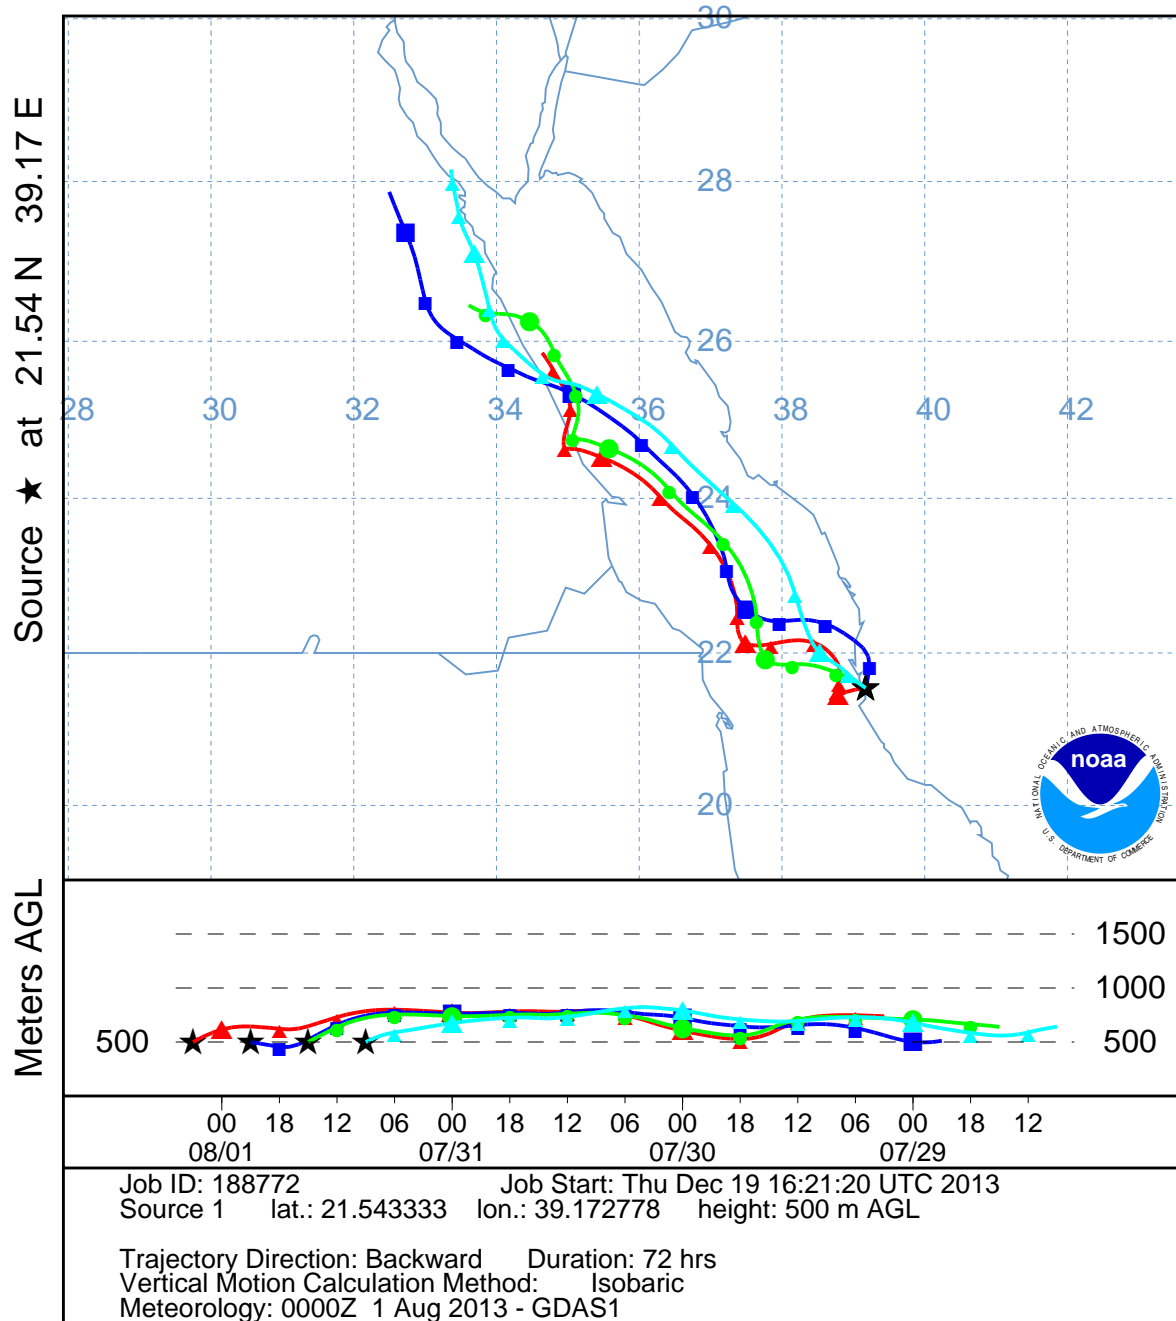

Supplement: s1 [file s1]

NOAA HYSPLIT MODEL  
Backward trajectories ending at 1100 UTC 22 Apr 13  
GDAS Meteorological Data

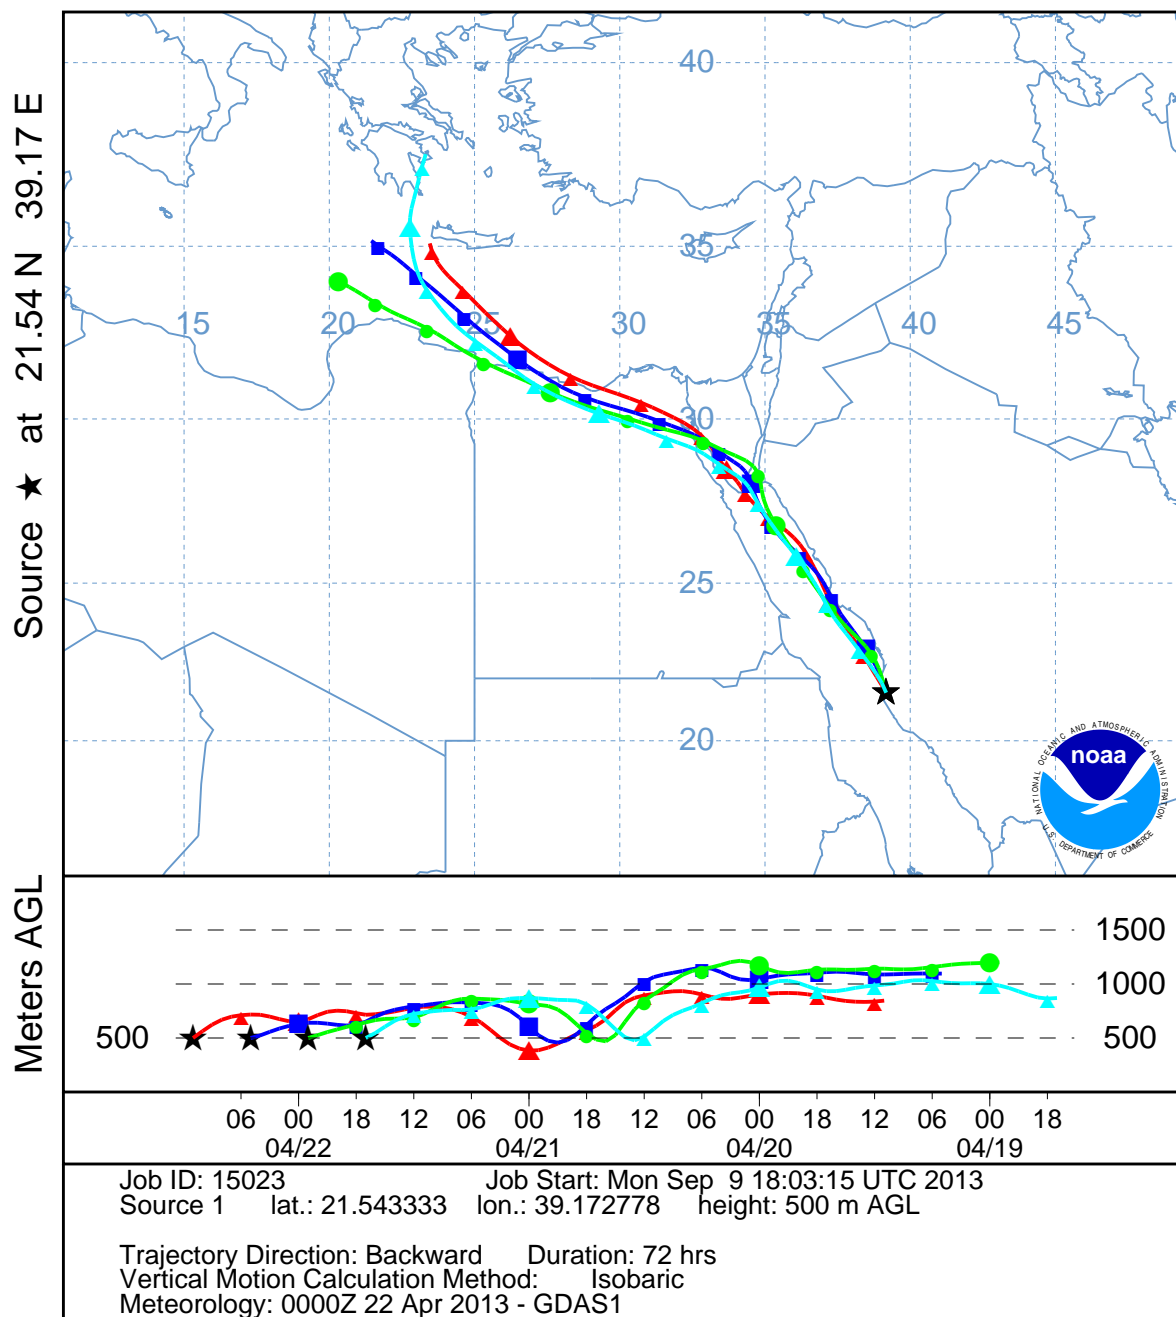

Supplement: s1 [file s1]

NOAA HYSPLIT MODEL  
Backward trajectories ending at 0800 UTC 27 Jan 14  
GDAS Meteorological Data

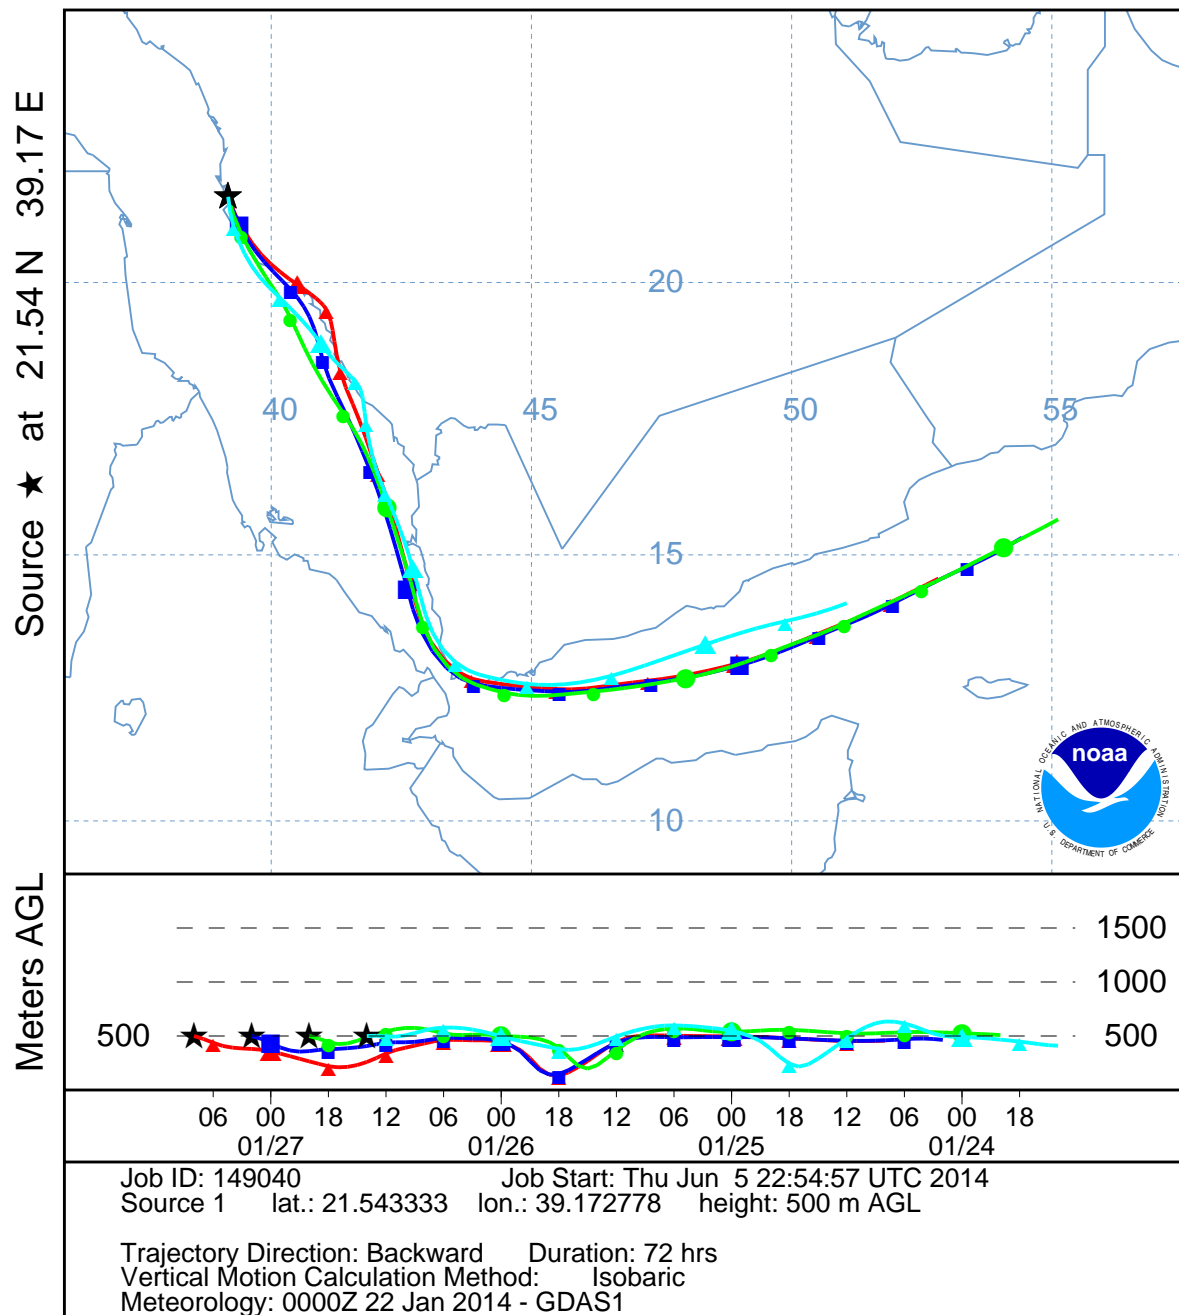

Supplement: s1 [file s1]

NOAA HYSPLIT MODEL  
Backward trajectories ending at 0300 UTC 12 Aug 13  
GDAS Meteorological Data

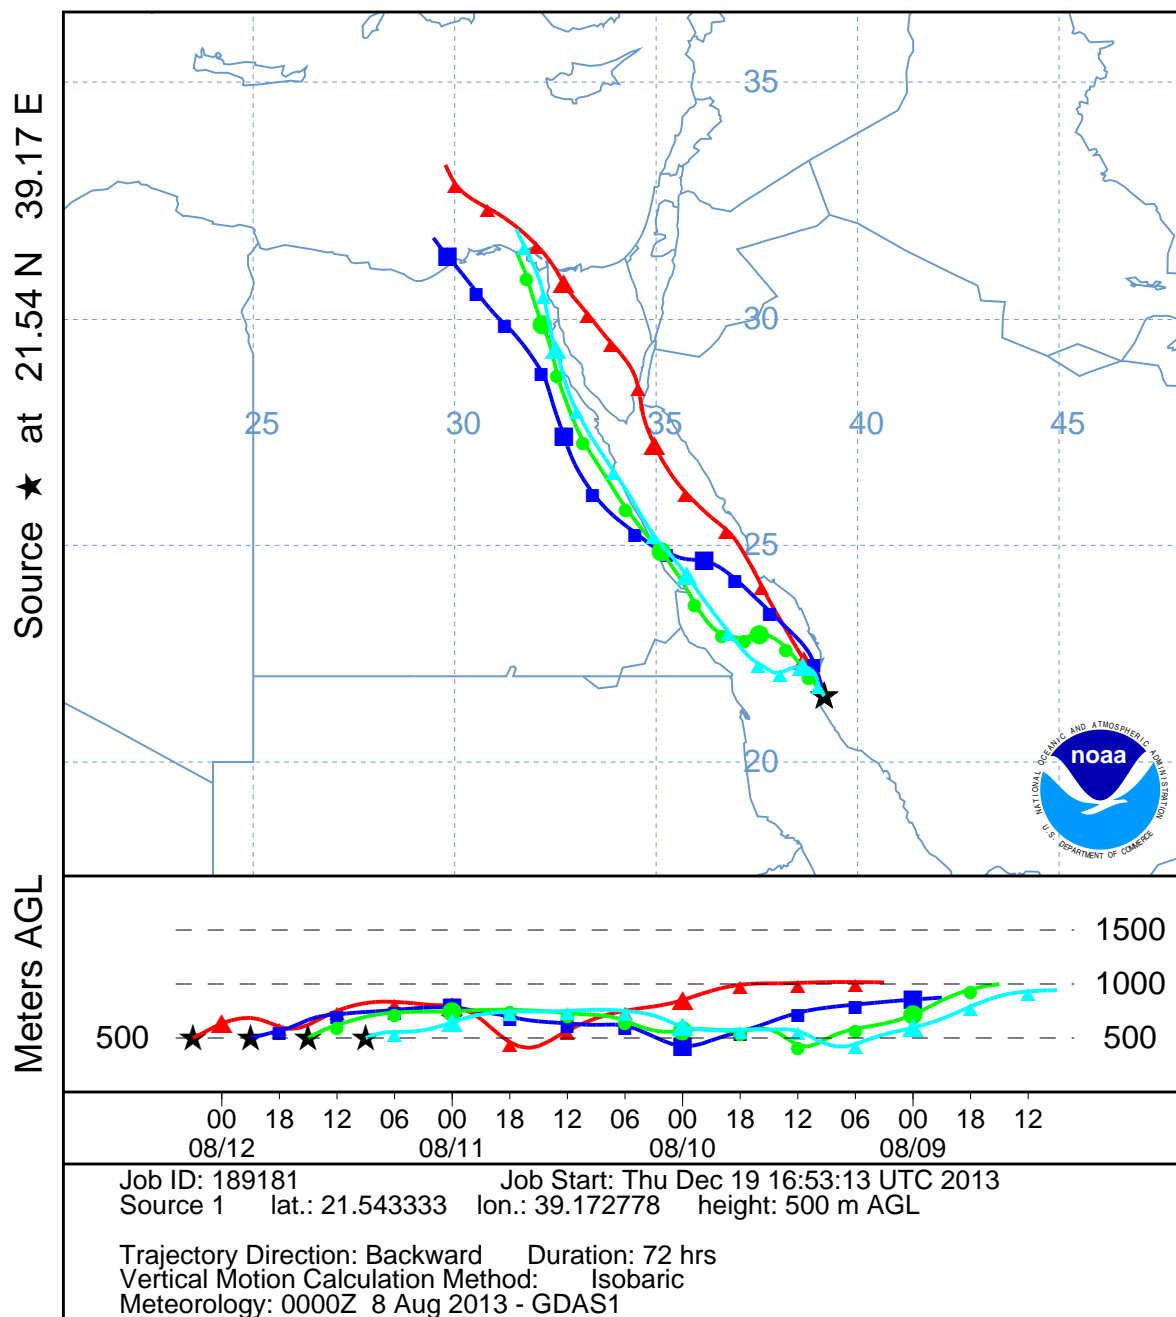

Supplement: s1 [file s1]

NOAA HYSPLIT MODEL  
Backward trajectories ending at 0900 UTC 06 Feb 14  
GDAS Meteorological Data

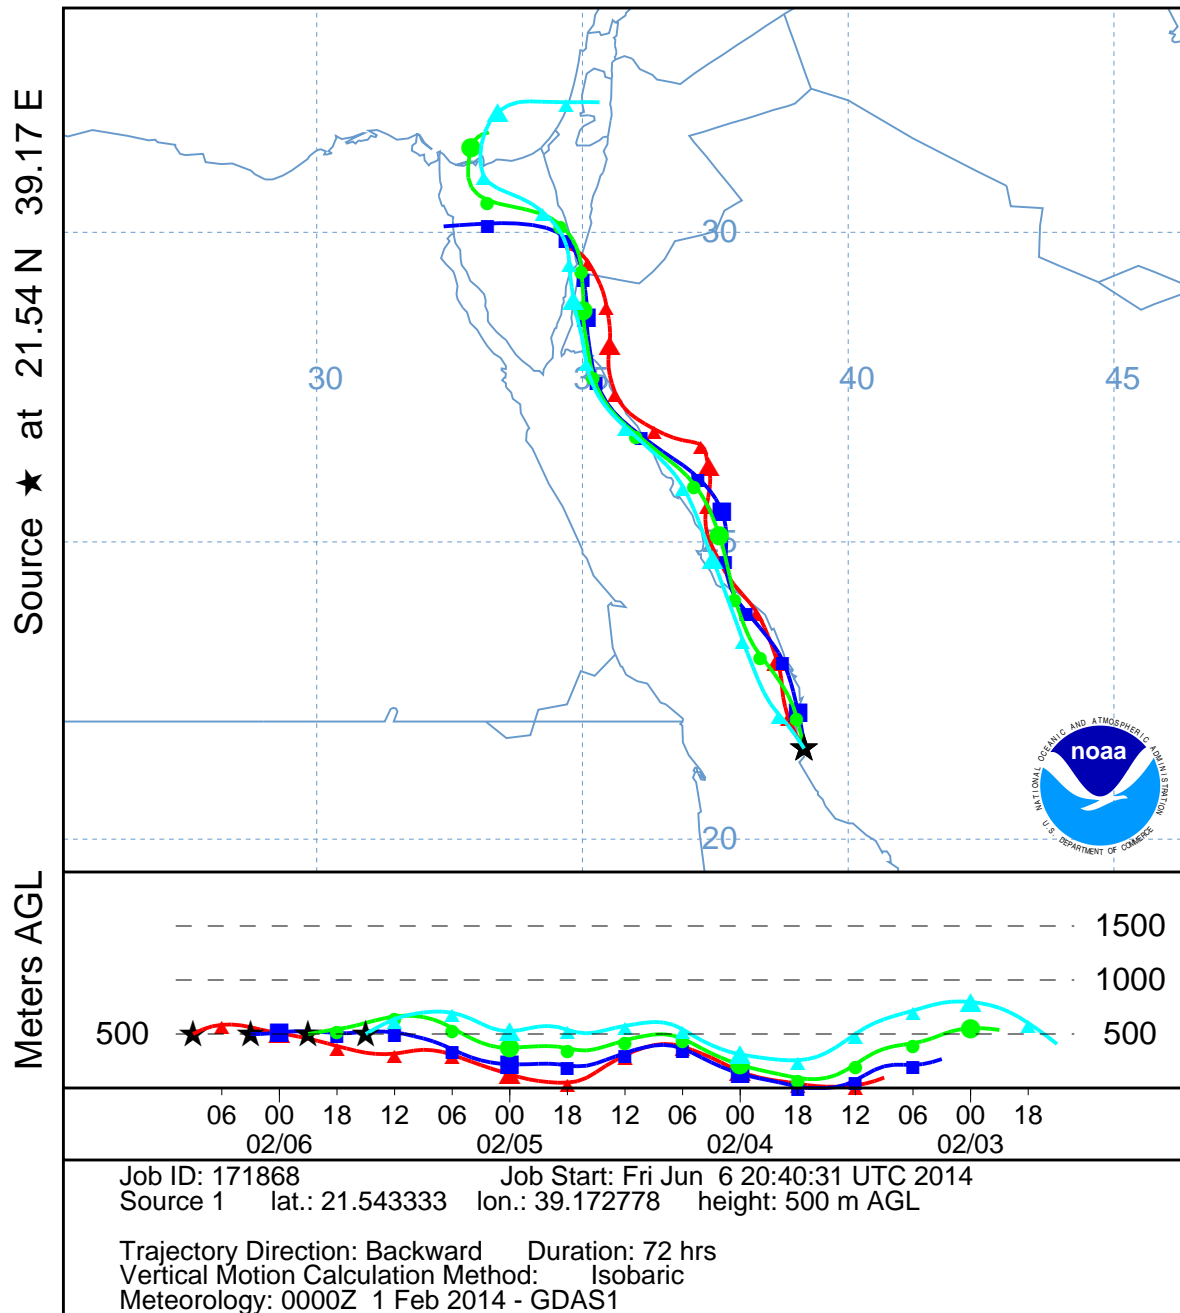

Supplement: s1 [file s1]
